# Supplementary material for: Validity of four clinical prediction scores for pulmonary embolism in a sub-Saharan African setting: a protocol for a Cameroonian multicentre cross-sectional study
Source: PubMed Central journal article supplement — BMJ Open. 2019 Oct 15;9(10):e031322. doi: 10.1136/bmjopen-2019-031322 (PMC6797288; doi:10.1136/bmjopen-2019-031322), 2019-10-15
Supplement: bmjopen-2019-031322.draft_revisions.pdf [file bmjopen-2019-031322.draft_revisions.pdf]

# BMJ Open

BMJ Open is committed to open peer review. As part of this commitment we make the peer review history of every article we publish publicly available.

When an article is published we post the peer reviewers' comments and the authors' responses online. We also post the versions of the paper that were used during peer review. These are the versions that the peer review comments apply to.

The versions of the paper that follow are the versions that were submitted during the peer review process. They are not the versions of record or the final published versions. They should not be cited or distributed as the published version of this manuscript.

BMJ Open is an open access journal and the full, final, typeset and author-corrected version of record of the manuscript is available on our site with no access controls, subscription charges or pay-per-view fees (<http://bmjopen.bmj.com>).

If you have any questions on BMJ Open's open peer review process please email [info.bmjopen@bmj.com](mailto:info.bmjopen@bmj.com)

# BMJ Open

## Validity of four clinical prediction scores for pulmonary embolism in a sub-Saharan African setting: a protocol for a multicentre Cameroonian cross-sectional study.

|                               |                                                                                                                                                                                                                                                                                                                                                                                                                                                                                                                                                                   |
|-------------------------------|-------------------------------------------------------------------------------------------------------------------------------------------------------------------------------------------------------------------------------------------------------------------------------------------------------------------------------------------------------------------------------------------------------------------------------------------------------------------------------------------------------------------------------------------------------------------|
| Journal:                      | <i>BMJ Open</i>                                                                                                                                                                                                                                                                                                                                                                                                                                                                                                                                                   |
| Manuscript ID                 | bmjopen-2019-031322                                                                                                                                                                                                                                                                                                                                                                                                                                                                                                                                               |
| Article Type:                 | Protocol                                                                                                                                                                                                                                                                                                                                                                                                                                                                                                                                                          |
| Date Submitted by the Author: | 28-Apr-2019                                                                                                                                                                                                                                                                                                                                                                                                                                                                                                                                                       |
| Complete List of Authors:     | Esiéné, Agnès ; Université de Yaounde I Faculte de Medecine et des Sciences Biomedicales, Department of Anesthesiology and Critical Care<br>Owono Etoundi, Paul ; University of Yaoundé I, Department of Anesthesiology and Critical Care<br>Tochie, Joel Noutakdie; Université de Yaounde I Faculte de Medecine et des Sciences Biomedicales,<br>Mbengono Metogo, Junette Arlette ; University of Yaoundé I, Department of Anesthesiology and Critical Care<br>Ze Minkande, Jacqueline; University of Yaounde I, Department of Anesthesiology and Critical Care, |
| Keywords:                     | pulmonary embolism, Wells score, Simplified Wells score, Revised Geneva score, Simplified Revised Geneva score, emergency department                                                                                                                                                                                                                                                                                                                                                                                                                              |
|                               |                                                                                                                                                                                                                                                                                                                                                                                                                                                                                                                                                                   |

SCHOLARONE™  
Manuscripts

1  
2  
3 **Validity of four clinical prediction scores for pulmonary embolism in a sub-Saharan**  
4  
5 **African setting: a protocol for a multicentre Cameroonian cross-sectional study.**  
6  
7  
8  
9

10 **Authors :** Agnès Esiéné<sup>1,2</sup>, Paul Owono Etoundi<sup>1,2</sup>, Joel Noutakdie Tochie<sup>1</sup>, Junette Arlette  
11 Mbengono Metogo<sup>1,3</sup>, Jacqueline Ze Minkande<sup>1,4</sup>  
12  
13

14 **Affiliations:**

15  
16 <sup>1</sup>Department of Anesthesiology and Critical Care, Faculty of Medicine and Biomedical  
17 Sciences, University of Yaoundé I, Yaoundé, Cameroon  
18

19 <sup>2</sup> Department of Emergency medicine, Anesthesiology and Critical Care, Yaounde Central  
20 Hospital, Yaoundé, Cameroon.  
21

22 <sup>3</sup>Department of Emergency medicine, Anesthesiology and Critical Care, Douala General  
23 Hospital, Douala, Cameroon  
24

25 <sup>4</sup>Department of Anesthesiology and Critical Care, Gynaeco-Obstetrics and Paediatric  
26 Hospital, Yaoundé, Cameroon.  
27  
28

29 **Author's e-mail:** Agnès Esiéné: [eseineagnes@gmail.com](mailto:eseineagnes@gmail.com); Joel Noutakdie Tochie:  
30 [joeltochie@gmail.com](mailto:joeltochie@gmail.com); Paul Owono Etoundi: [owonop@yahoo.com](mailto:owonop@yahoo.com); Junette Arlette  
31 Mbengono Metogo : [junetmel@yahoo.com](mailto:junetmel@yahoo.com); Jacqueline Ze Minkande:  
32 [minkandeze@yahoo.com](mailto:minkandeze@yahoo.com)  
33  
34  
35  
36  
37  
38  
39  
40  
41  
42

43 **Corresponding author:** Dr Joel Noutakdie Tochie, Faculty of Medicine and Biomedical  
44 Sciences, University of Yaoundé I, Yaoundé, Cameroon. Email: [joeltochie@gmail.com](mailto:joeltochie@gmail.com).  
45  
46 Telephone: (237) 676 55 88 25  
47  
48  
49

50 **Word count;** abstract: 271 words; manuscript: 1987 words  
51  
52  
53  
54  
55  
56  
57  
58  
59  
60

## Abstract

**Introduction:** Pulmonary embolism poses one of the most challenging diagnosis in medicine. Resolving these diagnostic difficulties is more crucial in emergency departments where fast and accurate decisions are needed to save lives. Here, clinical pretest evaluation is an important step in the diagnostic algorithm pulmonary embolism. Although clinical probability scores are widely used in emergency departments of sub-Saharan Africa, no study has cited their diagnostic performance in this resource-constrained environment. This study will seek to assess the accuracy of four routinely used clinical prediction models in Cameroonians presenting with pulmonary embolism in an acute setting.

**Methods and analysis:** It will be an analytic cross-sectional study comparing the sensitivity, specificity, positive and negative predictive values and accuracy of the Wells, simplified Wells, revised Geneva and the simplified revised Geneva Scores to computed tomography pulmonary angiography as gold standard in all consecutive consenting adults admitted for clinical suspicion of pulmonary embolism to the EDs of seven major referral hospital of Cameroon between July 1, 2019, and December 31, 2020. The area under the receiver operating curve of each the clinical prediction test will be calculated to best ascertain the most accurate test.

**Ethics and dissemination:** Clearance has been obtained from the Institutional Review board of the Faculty of medicine and biomedical sciences of the University of Yaounde I, Cameroon and the the directorates of all participating hospitals to conduct this study. Also, informed consent will be sought from each patients or their legal next of kin before enrollement into the study. The final study will be published in a peer-review journal and the findings presented to health authorities and the health providers.

1  
2  
3 **Keywords** : pulmonary embolism, Wells score, Simplified Wells score, Revised Geneva  
4 score, Simplified Revised Geneva score, emergency department, sub-Saharan African.  
5  
6  
7  
8  
9

10 **Strengths and Limitations of the study:**  
11  
12

- 13 • This is the first study to assess the diagnostic performance of CPS for PE in SSA. The  
14 study will provide insights on the test with the best pretest accuracy.  
15
- 16 • The multi-centric design with samples from several major referral EDs of Cameroon  
17 will ensure representative and generalizable findings.  
18
- 19 • Bias will be reduced by completing the each CPS for all patients before conduction of  
20 the CTPA and by blinding the results of CPS from the radiologists performing the  
21 CTPA.  
22
- 23 • Robust statistical methods like area under the receiver operating curve will be used to  
24 ascertain the test with the best pretest accuracy  
25
- 26 • Its main limitation is the inability to objectively assess the expertise of radiologists  
27 interpreting the results of CTPA, which is a paramount determinant of the amount of  
28 confirm PE cases. However, to curb this drawback only radiologists with a minimum  
29 of 10 years of clinical experience after qualifying would interpret the results of CTPA  
30  
31  
32  
33  
34  
35  
36  
37  
38  
39  
40  
41  
42  
43  
44  
45  
46  
47  
48  
49

50 **Background**  
51  
52

53 Pulmonary embolism (PE) is a potentially lethal sequelae of venous thromboembolism  
54 (VTE) with a reported 30-day mortality rate varying between 14-44% [1-4]. It poses  
55 considerable diagnostic difficulties in clinical practice and especially in emergency medicine,  
56 due to the polymorphism of its clinical manifestation and the lack of a pathognomonic symptom  
57  
58  
59  
60

1  
2  
3 or sign [5]. Hence, it is common for the diagnosis of PE to be easily overlooked [6,7] till  
4  
5 necropsy where it has been reported in 53% of autopsy reports [8]. Consequently, clinicians  
6  
7 have developed a high index of clinical suspicion of PE over the last decade [9]. However, of  
8  
9 all suspected PE patients, only 10-15% would be confirmed during diagnostic tests [10].  
10  
11 Overtesting leads to undue expenses, potential iatrogenic damages such as contrast-induced  
12  
13 allergic reactions, contrast-induced nephropathy[11] or radiation-induced solid tumors [12]  
14  
15 from multi-detector computed tomography pulmonary angiography (CTPA), its current gold  
16  
17 standard diagnostic test [13]. In an attempt to remedy the problem of undue investigations,  
18  
19 several clinical probability scores (CPS), among which the most widely used are the  
20  
21 Wells[14], simplified Wells[15], Revised Geneva [16] and Smplified Revised Geneva [17]  
22  
23 scores, were put forth to guide the choice of diagnostic testing depending on the assessed PE  
24  
25 probability (low, intermediate or high) [13]. Current guidelines recommend their use coupled  
26  
27 with D-dimer to preclude patients with a low PE probability from further diagnostic tests,  
28  
29 without compromising the patient's safety [13]. This diagnostic algorithm reduces the number  
30  
31 of unnecessary CTPA by 35%, with only 1-2% of missed cases in the group of patients with a  
32  
33 low PE probability [18]. This is of invaluable economic interest in resource-limited  
34  
35 emergency departments (EDs) of sub-Saharan Africa (SSA) where CTPA, has recently been  
36  
37 described to be financially and geographically inaccessible for majority of patients with  
38  
39 suspected PE [19].

40  
41 Globally, EDs and primary healthcare centers are at the forefront of the mangement of  
42  
43 patients with suspected PE[20]. Here, prompt and accurate ruling in or out the diagnosis of PE  
44  
45 is vital for a timely diagnosis and treatment. As mentioned above, the diagnosis of PE begins  
46  
47 with risk stratification through CPS to prevent patients with low PE probability from  
48  
49 unnecessary further testings [13,20]. Although these clinical prediction models have been  
50  
51 externally validated in of high-income countries where there were designed [21,22], the  
52  
53  
54  
55  
56  
57  
58  
59  
60

1  
2  
3 generalization of their validity to SSA remains questionable due to lack of data in this regards.  
4  
5 It is known that CPS derived in a particular setting often perform less well when applied in  
6  
7 another setting[23–26] due to discrepancies in disease prevalence and differences in  
8  
9 clinicians' experience of suspected cases [23]. Thus, generalizing the external validity of CPS  
10  
11 for PE to SSA without prior evidence is inappropriate given that several studies have showned  
12  
13 blacks to have a 30-60% increase in the incidence of PE [27–29], as well as a 30 % increase  
14  
15 in PE-related mortality compared to other racial groups[30].  
16  
17  
18  
19  
20  
21  
22

### 23 **Objectives**

24  
25  
26 The study objectives will be to assess the diagnostic performance of the original Wells,  
27  
28 simplified Wells, revised Geneva, and the simplified revised Geneva (SRG) scores in a  
29  
30 selected sub-Saharan African population admitted to the ED with suspicion of PE.  
31  
32  
33  
34  
35  
36  
37

### 38 **Methods and analysis**

39  
40  
41 This protocol is reported in accordance to the STROBE guidelines for cross-sectional studies  
42  
43 (additional file 1). The final study will be reported in conformity to the Tripod checklist for  
44  
45 prediction model validation.  
46  
47  
48

### 49 ***Study design, setting and duration***

50  
51 This will be a cross-sectional multicenter study carried out in the EDs of seven major referral  
52  
53 hospital of Cameroon: the National Emergency Medicine Centre of Cameroon, the Gynaeco-  
54  
55 obstetric and Paediatric Hospital of Yaoundé, the Yaoundé Central Hospital, the Yaoundé  
56  
57 General Hospital, the University Hospital Centre of Yaounde, the Douala General Hospital  
58  
59 and the Laquintinie Hospital of Douala Yaoundé Central Hospital between the period of July  
60

1  
2  
3 1, 2019, and December 31, 2020. All aforementioned hospitals are University Teaching  
4  
5 hospitals in the cities of Yaounde and Douala of Cameroon.  
6  
7

### 8 ***Patient eligibility criteria***

9  
10 We will prospectively recruit all consecutive patients aged above 15 years who will be  
11  
12 admitted to the aforementioned seven EDs for clinical suspicion of PE. Case definition of  
13  
14 clinical suspicion of PE will be any patient presenting with sudden dyspnoea, chest pain,  
15  
16 haemoptysis or syncope. We will exclude patients who will refuse to consent, those who will  
17  
18 not undergo CTPA to rule in or rule out PE despite clinical suspicion, patients with  
19  
20 contraindications to CTPA (haemodynamic instability, dehydration, altered renal function)  
21  
22 and those with a diagnosis of PE documented prior to ED admission.  
23  
24  
25  
26

### 27 ***Sampling method***

28  
29 A consecutive convenience sampling method will be used.  
30  
31  
32

### 33 ***Study Procedure***

34  
35 We will approach all consecutive patients admitted for clinical suspicion of PE in order to  
36  
37 obtain an informed consent. Using a pilot tested interview administered questionnaire, each  
38  
39 enrolled patient will be assess for PE clinically probability before any other test to avoid bias,  
40  
41 using four CPS, namely; the original Wells score, the simplified Wells score, the Revised  
42  
43 Geneva score and the SRG Score.  
44  
45  
46  
47

### 48 ***Definitions of Terms***

49  
50 Patients will be considered to have chronic heart failure, cancer, history of previous deep  
51  
52 venous thrombosis (DVT) or PE, or chronic pulmonary disease if these conditions will be  
53  
54 known prior to admission. Recent surgery will be defined as any surgical intervention  
55  
56 performed within the last four weeks prior to the patient's admission.  
57  
58  
59  
60



### ***Diagnostic testing and assessment of potential sources of bias***

Questionnaires will be completed and systematically reviewed for completeness before proceeding to further diagnostic testing. After assessment of the clinical prediction of PE, all patients with no contraindication such as dehydration and impaired renal function test, will undergo the goal standard diagnostic test, CTPA to either rule in or rule out the diagnosis of PE. The diagnosis of PE will be established by CTPA detection of an embolus in the pulmonary vasculature. Radiologists performing the CTPA will have a minimum of 10 years of clinical experience after qualifying and will be blinded to the results of CPS.

### **Data Management and Analysis**

Using CTPA as the goal standard test, the sensitivity, specificity, positive predictive value, negative predictive value and accuracy of each clinical probability score will be calculated. The sensitivity of each CPS will be calculated as the proportion of patients with CTPA proven PE who will have a PE likely probability. The specificity of each the four CPS will be calculated as the proportion of patients with CTPA rule out PE who will have a PE unlikely score. The positive predictive value will be calculated as the proportion of patients with PE likely score who will have CTPA confirmed PE. The negative predictive value of each CPS will be calculated as the proportion of patients with PE unlikely score who will be ruled out of PE by CTPA. The accuracy of each clinical score will be calculated as the proportion of true results (true positives and true negatives) or the number of correct clinical assessments divided by the number of all assessments. Data will be entered into the Statistical Package for Social Sciences (SPSS) version 20.0 for analysis. Measures of discrimination such as area under the curve (AUC) and measures of calibration (calibration plots, Hosmer and Lemeshow statistics, observed/expected event rates, etc) would be used to better ascertain the accuracy of each CPS. To ease analysis the predictive models were dichotomized as follows;

- Original Wells scores between 0-4 and  $> 4$  will be considered PE unlikely and PE likely respectively (Table 1).
- Simplified Wells scores between  $\leq 1$  and  $> 1$  will be considered as PE unlikely and PE likely respectively (Table 1).
- Revised Geneva scores between 0-5 and  $\geq 6$  will be considered PE unlikely and PE likely respectively (Table 2).
- SRG scores while 0-2 and  $\geq 3$  will be considered PE unlikely and PE likely respectively (Table 2).

### **Patient and Public Involvement**

Unlike the public, patients will be involved in the conception and design of this protocol.

### **Ethics and dissemination**

Clearance has been granted by the Institutional Review board of the Faculty of medicine and biomedical sciences of the University of Yaounde I, Cameroon and the the directorates of all participating hospitals to conduct this study. Also, informed consent will be sought from each patients or their legal next of kin before enrollement into the study. The final study will be published in a peer-review journal and the findings presented to health authorities and the health providers.

### **Discussion**

PE is the most life threatening complication of VTE. It poses a significant diagnostic challenge in clinical practice and particularly in emergency medicine, due to its polymorphic clinical presentation and absence of pathognomic clinical signs. Although CPS are routinely used in EDs of low-resource settings, few studies have cited their external validity in SSA.

1  
2  
3 We intend to use robust statistical methods with the measurement of discrimination such as  
4  
5 area under the curve (AUC) and measures of calibration (calibration plots, Hosmer and  
6  
7 Lemeshow statistics, observed/expected event rates, etc) which would help ascertain the  
8  
9 mosy accurate CPS amongst the four assessed. The findings of this study may guide  
10  
11 clinicians in making informed decisions in predicting PE diagnosis and identifiation of  
12  
13 patients at need of further testing or may be anticoagulants therapy in resource-challenged  
14  
15 environments were CTPA is not always available or affordable to confirm the diagosis of PE.  
16  
17  
18  
19

### 20 **List of Abbreviations**

21  
22  
23 ED : Emergency department ; CPS : Clinical probability score ; CTPA : computed  
24  
25 tomography pulmonary angiography ; PE : Pulmonary embolism ; SSA : sub-Sahara Africa :  
26  
27 SRG : Simplified Revised Geneva.  
28  
29  
30

### 31 **Acknowledgments**

32  
33 The authors thank all administrative staff of participating hospital for granting us  
34  
35 authorisation to conduct this study.  
36  
37

38 **Competing interests:** The authors declare that they have no competing interests.  
39  
40

### 41 **Funding**

42  
43  
44 This study received no specific grant from any funding agency in the public, commercial or  
45  
46 not-for-profit sectors.  
47  
48  
49

50 **Authors' Contributions:** AE and JNT: Study protocol conception, design and manuscript  
51  
52 writing. POE, JAMM and JZM: critically revised the manuscript for intellectual content. All  
53  
54 authors read and approved the final manuscript.  
55  
56  
57

58 **Competing interests:** The authors declare that they have no competing interests.  
59  
60

1  
2  
3 **Data statement** : All data relevant to the study are included in the article or uploaded as  
4  
5 **supplementary information**. Any other information are available on request from the  
6  
7  
8 corresponding author at: joeltochie@gmail.com.  
9

## 16 **References**

- 17  
18 1. Mantilla CB, Horlocker TT, Schroeder DR, Berry DJ, Brown DL. Frequency of  
19 myocardial infarction, pulmonary embolism, deep venous thrombosis, and death  
20 following primary hip or knee arthroplasty. *Anesthesiology*. 2002;1140–6.  
21
- 22  
23 2. Comfere TB, Sprung J, Case KA, Dye PT, Johnson JL, Hall BA, et al. Predictors of  
24 mortality following symptomatic pulmonary embolism in patients undergoing  
25 noncardiac surgery. *Can J Anaesth*. 2007;54(8):634–41.  
26
- 27  
28 3. Sakon M, Kakkar AK, Ikeda M, Sekimoto M, Nakamori S, Yano M, et al. Current  
29 status of pulmonary embolism in general surgery in Japan. *Surg Today*. 2004;805–10.  
30
- 31  
32 4. Heit JA, Silverstein MD, Mohr DN, Petterson TM, O’Fallon WM, Melton LJ 3rd.  
33 Predictors of survival after deep vein thrombosis and pulmonary embolism: a  
34 population-based, cohort study. *Arch Intern Med*. 1999;445–53.  
35
- 36  
37 5. Jan Belohlavek, Vladimír Dytrych, Ales Linhart. Pulmonary embolism, part I:  
38 Epidemiology, risk factors and risk stratification, pathophysiology, clinical presentation,  
39 diagnosis and nonthrombotic pulmonary embolism. *Exp Clin Cardiol*. 2013;129–38.  
40
- 41  
42 6. Barais M, Morio N, Cuzon Breton A, et al. “I can’t find anything wrong: it must be a  
43 pulmonary embolism”: diagnosing suspected pulmonary embolism in primary care, a  
44 qualitative study. *PLoS One* 2014;9:e98112.  
45
- 46  
47 7. Schiff GD, Hasan O, Kim S, Abrams R, Cosby K, Lambert BL, et al. Diagnostic error in  
48 medicine: analysis of 583 physician-reported errors. *Arch Intern Med*.  
49 2009;169(20):1881–7.  
50
- 51  
52 8. Lindblad B, Eriksson A, Bergqvist D. Autopsy-verified pulmonary embolism in a  
53 surgical department: analysis of the period from 1951 to 1988. *Br J Surg*. 1991;1849–52.  
54
- 55  
56 9. Wiener RS, Schwartz LM, Woloshin S. Time Trends in Pulmonary Embolism in the  
57 United States: Evidence of Overdiagnosis. *Arch Intern Med*. 2011;171(9):831–7.  
58
- 59  
60 10. Le Gal G, Bounameaux H. Diagnosing pulmonary embolism: running after the  
decreasing prevalence of cases among suspected patients. *J Thromb Haemost*.  
2004;2(8):1244–6.

11. Mitchell AM, Kline JA. Contrast nephropathy following computed tomography angiography of the chest for pulmonary embolism in the emergency department. *J Thromb Haemost.* 2007;50–4.
12. Cochran ST, Bomyea K, Sayre JW. Trends in adverse events after IV administration of contrast media. *Am J Roentgenol.* 2001;1385–8.
13. Konstantinides SV, Torbicki A, Agnelli G, Danchin N, Fitzmaurice D, Galiè N, et al. 2014 ESC Guidelines on the diagnosis and management of acute pulmonary embolism: The Task Force for the Diagnosis and Management of Acute Pulmonary Embolism of the European Society of Cardiology (ESC) Endorsed by the European Respiratory Society (ERS). *Eur Heart J.* 2014;35(43):3033–73.
14. Wells PS, Ginsberg JS, Anderson DR, Kearon C, Gent M, Turpie AG, et al. Use of a clinical model for safe management of patients with suspected pulmonary embolism. *Ann Intern Med.* 1998;997–1005.
15. Wells PS, Anderson DR, Rodger M, Ginsberg JS, Kearon C, Gent M, et al. Derivation of a simple clinical model to categorize patient's probability of pulmonary embolism: increasing the model's utility with the SimpliRED d-dimer. *Thromb Haemost.* 2000;416–420.
16. Le Gal G, Righini M, Roy PM, Sanchez O, Aujesky D, Bounameaux H, et al. Prediction of pulmonary embolism in the emergency department: the revised Geneva score. *Ann Intern Med.* 2006;165–71.
17. Kline JA, Nelson RD, Jackson RE, Courtney DM. Criteria for the safe use of d-dimer testing in emergency department patients with suspected pulmonary embolism: a multicenter US study. *Ann Emerg Med.* 2002;144–152.
18. Lucassen W, Geersing G-J, Erkens PMG, Reitsma JB, Moons KGM, Büller H, et al. Clinical Decision Rules for Excluding Pulmonary Embolism: A Meta-analysis. *Ann Intern Med.* 2011;155(7):448.
19. Joshua Tambe, Boniface Moifo, Emmanuel Fongang, Emilienne Guegang, Alain Georges Juimo. Acute pulmonary embolism in the era of multi-detector CT: a reality in sub-Saharan Africa. *BMC Medical Imaging.* 2012;31.
20. Hendriksen JMT, Geersing GJ, Lucassen WAM, Erkens PMG, Stoffers HEJH, van Weert HCPM, et al. Diagnostic prediction models for suspected pulmonary embolism: systematic review and independent external validation in primary care. *BMJ* 2015;351:101hhh;3.
21. Righini M, Bounameaux H. External validation and comparison of recently described prediction rules for suspected pulmonary embolism. *Curr Opin Pulm Med.* 2004;345–9.
22. Hendriksen J M T, Geersing G J, Lucassen W A M, Erkens P M G, Stoffers H E J H, van Weert H C P M, et al. Diagnostic prediction models for suspected pulmonary embolism: systematic review and independent external validation in primary care. *BMJ.* 2015;h4438.

- 1  
2  
3 23. Moons KGM, Kengne AP, Grobbee DE, Royston P, Vergouwe Y, Altman DG, et al.  
4 Risk prediction models: II. External validation, model updating, and impact assessment.  
5 Heart. 2012;98(9):691–8.  
6  
7 24. Altman DG, Royston P. What do we mean by validating a prognostic model? Stat Med.  
8 2000;19(4):453–73.  
9  
10 25. Reilly BM, Evans AT. Translating clinical research into clinical practice: impact of  
11 using prediction rules to make decisions. Ann Intern Med. 2006;144(3):201–9.  
12  
13 26. Justice AC, Covinsky KE, Berlin JA. Assessing the generalizability of prognostic  
14 information. Ann Intern Med. 1999;130(6):515–24.  
15  
16 27. White RH, Keenan CR. Effects of race and ethnicity on the incidence of venous  
17 thromboembolism. Thromb Res. 2009;S11–S17.  
18  
19 28. Zakai N, Lutsey P, Folsom A, Cushman M. Black-white differences in venous  
20 thrombosis risk: the Longitudinal Investigation of Thromboembolism Etiology (LITE).  
21 Blood ASH Annual Meeting Abstracts. 2010;478.  
22  
23 29. Schneider D, Lilienfeld DE, Wansoo Im. The Epidemiology of Pulmonary Embolism:  
24 Racial Contrasts in Incidence and In-Hospital Case Fatality. JOURNAL OF THE  
25 NATIONAL MEDICAL ASSOCIATION. 2006;1967–72.  
26  
27 30. Ibrahim SA, Stone RA, Obrosky DS, Sartorius J, Fine MJ, Aujesky D. Racial  
28 Differences in 30-Day Mortality for Pulmonary Embolism. Am J Public Health.  
29 2006;96(12):2161–4.  
30  
31  
32  
33  
34  
35  
36  
37  
38  
39

40 **Table 1: The Original Wells score and Simplified Wells score for Pulmonary embolism**

| Predictive variables                      | Original Wells score        | Simplified Wells score      |
|-------------------------------------------|-----------------------------|-----------------------------|
| Previous PE or DVT                        | 1.5                         | 1                           |
| Heart rate > 100 bpm                      | 1.5                         | 1                           |
| Recent surgery or immobilization          | 1.5                         | 1                           |
| Clinical signs of DVT                     | 3                           | 1                           |
| Alternative diagnosis less likely than PE | 3                           | 1                           |
| Haemoptysis                               | 1                           | 1                           |
| Cancer                                    | 1                           | 1                           |
|                                           | <b>Pretest probability;</b> | <b>Pretest probability;</b> |
|                                           | 0 – 1: low                  | ≤ 1: PE unlikely (low)      |
|                                           | 2– 6: moderate              | >1: PE likely (high)        |
|                                           | ≥ 7 : high                  |                             |
|                                           | <b>Dichotomized score:</b>  |                             |
|                                           | ≤ 4: PE unlikely (low)      |                             |
|                                           | >4: PE likely (high)        |                             |
| DVT: Deep venous thrombosis               | PE: Pulmonary embolism      |                             |

**Table 2: The Revised Geneva score and Simplified Revised Geneva score for Pulmonary embolism**

| Predictive variables                                                 | Revised Geneva score        | Simplified Revised Geneva score |
|----------------------------------------------------------------------|-----------------------------|---------------------------------|
| Age > 65 years                                                       | 1                           | 1                               |
| Active malignancy (or considered cure < 1 year )                     | 2                           | 1                               |
| Recent surgery or fracture of the lower limbs within 1 month         | 2                           | 1                               |
| Previous PE or DVT                                                   | 3                           | 1                               |
| Haemoptysis                                                          | 2                           | 1                               |
| Unilateral lower limb pain                                           | 3                           | 1                               |
| Tenderness on lower limb deep venous palpation and unilateral oedema | 4                           | 1                               |
| Heart rate                                                           |                             |                                 |
| 75 – 94 bpm                                                          | 3                           | 1                               |
| ≥ 95 bpm                                                             | 5                           | 2                               |
|                                                                      | <b>Pretest probability;</b> | <b>Pretest probability;</b>     |
|                                                                      | 0 – 3: low                  | 0 – 1: low                      |
|                                                                      | 4– 10: moderate             | 2– 4: moderate                  |
|                                                                      | ≥ 11 : high                 | ≥ 5 : high                      |
|                                                                      | <b>Dichotomized score:</b>  | <b>Dichotomized score:</b>      |

1  
2  
3  
4  
5  
6  
7  
8  
9  
10  
11  
12  
13  
14  
15  
16  
17  
18  
19  
20  
21  
22  
23  
24  
25  
26  
27  
28  
29  
30  
31  
32  
33  
34  
35  
36  
37  
38  
39  
40  
41  
42  
43  
44  
45  
46  
47  
48  
49  
50  
51  
52  
53  
54  
55  
56  
57  
58  
59  
60

0 - 5: PE unlikely (low)  
≥ 6: PE likely (high)

0 - 2: PE unlikely (low)  
≥ 3: PE likely (high)

---

DVT: Deep venous thrombosis    PE: Pulmonary embolism

For peer review only



1  
2  
3  
4  
5  
6  
7  
8  
9  
10  
11  
12  
13  
14  
15  
16  
17  
18  
19  
20  
21  
22  
23  
24  
25  
26  
27  
28  
29  
30  
31  
32  
33  
34  
35  
36  
37  
38  
39  
40  
41  
42  
43  
44  
45  
46  
47  
48  
49  
50  
51  
52  
53  
54  
55  
56  
57  
58  
59  
60STROBE Statement—Checklist of items that should be included in reports of *cross-sectional studies*

|                              | Item No | Recommendation                                                                                                                                                                                                                                                                                                                                                                                                |                                                 |
|------------------------------|---------|---------------------------------------------------------------------------------------------------------------------------------------------------------------------------------------------------------------------------------------------------------------------------------------------------------------------------------------------------------------------------------------------------------------|-------------------------------------------------|
| <b>Title and abstract</b>    | 1       | (a) Indicate the study's design with a commonly used term in the title or the abstract<br>(b) Provide in the abstract an informative and balanced summary of what was done and what was found                                                                                                                                                                                                                 | page 2<br>page 2                                |
| <b>Introduction</b>          |         |                                                                                                                                                                                                                                                                                                                                                                                                               |                                                 |
| Background/rationale         | 2       | Explain the scientific background and rationale for the investigation being reported                                                                                                                                                                                                                                                                                                                          | page 3 to 5                                     |
| Objectives                   | 3       | State specific objectives, including any prespecified hypotheses                                                                                                                                                                                                                                                                                                                                              | Page 5                                          |
| <b>Methods</b>               |         |                                                                                                                                                                                                                                                                                                                                                                                                               |                                                 |
| Study design                 | 4       | Present key elements of study design early in the paper                                                                                                                                                                                                                                                                                                                                                       | Page 5                                          |
| Setting                      | 5       | Describe the setting, locations, and relevant dates, including periods of recruitment, exposure, follow-up, and data collection                                                                                                                                                                                                                                                                               | Page 5                                          |
| Participants                 | 6       | (a) Give the eligibility criteria, and the sources and methods of selection of participants                                                                                                                                                                                                                                                                                                                   | Page 6                                          |
| Variables                    | 7       | Clearly define all outcomes, exposures, predictors, potential confounders, and effect modifiers. Give diagnostic criteria, if applicable                                                                                                                                                                                                                                                                      | 6 to 8                                          |
| Data sources/<br>measurement | 8*      | For each variable of interest, give sources of data and details of methods of assessment (measurement). Describe comparability of assessment methods if there is more than one group                                                                                                                                                                                                                          | 7                                               |
| Bias                         | 9       | Describe any efforts to address potential sources of bias                                                                                                                                                                                                                                                                                                                                                     | 7                                               |
| Study size                   | 10      | Explain how the study size was arrived at                                                                                                                                                                                                                                                                                                                                                                     |                                                 |
| Quantitative variables       | 11      | Explain how quantitative variables were handled in the analyses. If applicable, describe which groupings were chosen and why                                                                                                                                                                                                                                                                                  | 6<br>7 and 8                                    |
| Statistical methods          | 12      | (a) Describe all statistical methods, including those used to control for confounding<br>(b) Describe any methods used to examine subgroups and interactions<br>(c) Explain how missing data were addressed<br>(d) If applicable, describe analytical methods taking account of sampling strategy<br>(e) Describe any sensitivity analyses                                                                    | 7 and 8<br>7 and 8<br>N/A<br>7 and 8<br>7 and 8 |
| <b>Results</b>               |         |                                                                                                                                                                                                                                                                                                                                                                                                               |                                                 |
| Participants                 | 13*     | (a) Report numbers of individuals at each stage of study—eg numbers potentially eligible, examined for eligibility, confirmed eligible, included in the study, completing follow-up, and analysed<br>(b) Give reasons for non-participation at each stage<br>(c) Consider use of a flow diagram                                                                                                               | N/A<br>N/A<br>N/A                               |
| Descriptive data             | 14*     | (a) Give characteristics of study participants (eg demographic, clinical, social) and information on exposures and potential confounders<br>(b) Indicate number of participants with missing data for each variable of interest                                                                                                                                                                               | N/A<br>N/A                                      |
| Outcome data                 | 15*     | Report numbers of outcome events or summary measures                                                                                                                                                                                                                                                                                                                                                          | N/A                                             |
| Main results                 | 16      | (a) Give unadjusted estimates and, if applicable, confounder-adjusted estimates and their precision (eg, 95% confidence interval). Make clear which confounders were adjusted for and why they were included<br>(b) Report category boundaries when continuous variables were categorized<br>(c) If relevant, consider translating estimates of relative risk into absolute risk for a meaningful time period | N/A<br>N/A<br>N/A                               |
| Other analyses               | 17      | Report other analyses done—eg analyses of subgroups and interactions, and sensitivity analyses                                                                                                                                                                                                                                                                                                                | N/A                                             |

|                          |    |                                                                                                                                                                            |     |
|--------------------------|----|----------------------------------------------------------------------------------------------------------------------------------------------------------------------------|-----|
| <b>Discussion</b>        |    |                                                                                                                                                                            | N/A |
| Key results              | 18 | Summarise key results with reference to study objectives                                                                                                                   | N/A |
| Limitations              | 19 | Discuss limitations of the study, taking into account sources of potential bias or imprecision. Discuss both direction and magnitude of any potential bias                 | N/A |
| Interpretation           | 20 | Give a cautious overall interpretation of results considering objectives, limitations, multiplicity of analyses, results from similar studies, and other relevant evidence | N/A |
| Generalisability         | 21 | Discuss the generalisability (external validity) of the study results                                                                                                      | N/A |
| <b>Other information</b> |    |                                                                                                                                                                            |     |
| Funding                  | 22 | Give the source of funding and the role of the funders for the present study and, if applicable, for the original study on which the present article is based              | N/A |

\*Give information separately for exposed and unexposed groups.

**Note:** An Explanation and Elaboration article discusses each checklist item and gives methodological background and published examples of transparent reporting. The STROBE checklist is best used in conjunction with this article (freely available on the Web sites of PLoS Medicine at <http://www.plosmedicine.org/>, Annals of Internal Medicine at <http://www.annals.org/>, and Epidemiology at <http://www.epidem.com/>). Information on the STROBE Initiative is available at [www.strobe-statement.org](http://www.strobe-statement.org).

# BMJ Open

## The validity of four clinical prediction scores for pulmonary embolism in a sub-Saharan African setting: a protocol for a multicentre Cameroonian cross-sectional study.

|                                 |                                                                                                                                                                                                                                                                                                                                                                                                                                                                                                                                                                   |
|---------------------------------|-------------------------------------------------------------------------------------------------------------------------------------------------------------------------------------------------------------------------------------------------------------------------------------------------------------------------------------------------------------------------------------------------------------------------------------------------------------------------------------------------------------------------------------------------------------------|
| Journal:                        | <i>BMJ Open</i>                                                                                                                                                                                                                                                                                                                                                                                                                                                                                                                                                   |
| Manuscript ID                   | bmjopen-2019-031322.R1                                                                                                                                                                                                                                                                                                                                                                                                                                                                                                                                            |
| Article Type:                   | Protocol                                                                                                                                                                                                                                                                                                                                                                                                                                                                                                                                                          |
| Date Submitted by the Author:   | 07-Aug-2019                                                                                                                                                                                                                                                                                                                                                                                                                                                                                                                                                       |
| Complete List of Authors:       | Esiéné, Agnès ; Universite de Yaounde I Faculte de Medecine et des Sciences Biomedicales, Department of Anesthesiology and Critical Care<br>Owono Etoundi, Paul ; University of Yaoundé I, Department of Anesthesiology and Critical Care<br>Tochie, Joel Noutakdie; Universite de Yaounde I Faculte de Medecine et des Sciences Biomedicales,<br>Mbengono Metogo, Junette Arlette ; University of Yaoundé I, Department of Anesthesiology and Critical Care<br>Ze Minkande, Jacqueline; University of Yaounde I, Department of Anesthesiology and Critical Care, |
| <b>Primary Subject Heading</b>: | Emergency medicine                                                                                                                                                                                                                                                                                                                                                                                                                                                                                                                                                |
| Secondary Subject Heading:      | Cardiovascular medicine, Respiratory medicine                                                                                                                                                                                                                                                                                                                                                                                                                                                                                                                     |
| Keywords:                       | pulmonary embolism, Wells score, Simplified Wells score, Revised Geneva score, Simplified Revised Geneva score, emergency department                                                                                                                                                                                                                                                                                                                                                                                                                              |
|                                 |                                                                                                                                                                                                                                                                                                                                                                                                                                                                                                                                                                   |

SCHOLARONE™  
Manuscripts

1  
2  
3 1 **The validity of four clinical prediction scores for pulmonary embolism in a sub-Saharan**  
4  
5 2 **African setting: a protocol for a multicentre Cameroonian cross-sectional study.**  
6  
7

8  
9 3  
10 4 **Authors :** Agnès Esiéné<sup>1,2</sup>, Paul Owono Etoundi<sup>1,2</sup>, Joel Noutakdie Tochie<sup>1</sup>, Junette Arlette  
11 5 Mbengono Metogo<sup>1,3</sup>, Jacqueline Ze Minkande<sup>1,4</sup>  
12 6

13  
14 7 **Affiliations:**

15  
16 8 <sup>1</sup>Department of Anesthesiology and Critical Care, Faculty of Medicine and Biomedical  
17 9 Sciences, University of Yaoundé I, Yaoundé, Cameroon

18  
19 10 <sup>2</sup> Department of Emergency medicine, Anesthesiology and Critical Care, Yaounde Central  
20 11 Hospital, Yaoundé, Cameroon.

21  
22 12 <sup>3</sup>Department of Emergency medicine, Anesthesiology and Critical Care, Douala General  
23 13 Hospital, Douala, Cameroon

24  
25 14 <sup>4</sup>Department of Anesthesiology and Critical Care, Gynaeco-Obstetrics and Paediatric  
26 15 Hospital, Yaoundé, Cameroon.

27  
28 16 **Author's e-mail:** Agnès Esiéné: [eseineagnes@gmail.com](mailto:eseineagnes@gmail.com); Joel Noutakdie Tochie:  
29 17 [joeltochie@gmail.com](mailto:joeltochie@gmail.com); Paul Owono Etoundi: [owonop@yahoo.com](mailto:owonop@yahoo.com); Junette Arlette  
30 18 Mbengono Metogo : [junetmel@yahoo.com](mailto:junetmel@yahoo.com); Jacqueline Ze Minkande:  
31 19 [minkandeze@yahoo.com](mailto:minkandeze@yahoo.com)  
32  
33  
34  
35  
36  
37  
38  
39  
40  
41  
42

43 21 **Corresponding author:** Dr. Joel Noutakdie Tochie, Faculty of Medicine and Biomedical  
44 22 Sciences, University of Yaoundé I, Yaoundé, Cameroon. Email: [joeltochie@gmail.com](mailto:joeltochie@gmail.com).  
45 23 Telephone: (237) 676 55 88 25  
46  
47  
48  
49

50 24 **Word count;** abstract: 271 words; manuscript: 1987 words  
51  
52  
53  
54  
55  
56  
57  
58  
59  
60 27

## 1 **Abstract**

2 **Introduction:** Pulmonary embolism poses one of the most challenging diagnoses in medicine.  
3 Resolving these diagnostic difficulties is more crucial in emergency departments where fast  
4 and accurate decisions are needed for a life-saving purpose. Here, clinical pre-test evaluation  
5 is an important step in the diagnostic algorithm pulmonary embolism. Although clinical  
6 probability scores are widely used in emergency departments of sub-Saharan Africa, no study  
7 has cited their diagnostic performance in this resource-constrained environment. This study  
8 will seek to assess the performance of four routinely used clinical prediction models in  
9 Cameroonians presenting with suspicion of pulmonary embolism at the emergency  
10 department.

11 **Methods and analysis:** It will be a cross-sectional study comparing the sensitivity,  
12 specificity, positive and negative predictive values and accuracy of the Wells, Simplified  
13 Wells, Revised Geneva and the Simplified Revised Geneva Scores to computed tomography  
14 pulmonary angiography as gold standard in all consecutive consenting patients aged above 15  
15 years admitted for clinical suspicion of pulmonary embolism to the emergency departments of  
16 seven major referral hospitals of Cameroon between July 1, 2019, and December 31, 2020.  
17 The area under the receiver operating curve, calibration plots, Hosmer and Lemeshow  
18 statistics, observed/expected event rates, net benefit and decision curve will be measured of  
19 each the clinical prediction test to ascertain the clinical score with the best diagnostic  
20 performance.

21 **Ethics and dissemination:** Clearance has been obtained from the Institutional Review Board  
22 of the Faculty of medicine and biomedical sciences of the University of Yaounde I, Cameroon  
23 and the directorates of all participating hospitals to conduct this study. Also, informed consent  
24 will be sought from each patient or their legal next of kin and parents for minors, before

1 enrollment into this study. The final study will be published in a peer-review journal and the  
2 findings presented to health authorities and healthcare providers.

3 **Keywords:** pulmonary embolism, Wells score, Simplified Wells score, Revised Geneva  
4 score, Simplified Revised Geneva score, emergency department, African.

### 6 **Strengths and Limitations of the study:**

- 7 • This is the first study to assess the diagnostic performance of four routine clinical  
8 probability scores (CPS) for pulmonary embolism (PE) in sub-Saharan Africa, hence,  
9 may provide an insight on the CPS with the best diagnostic performance.
- 10 • The multi-centric design with samples from seven major referral emergency  
11 departments of Cameroon will help to yield more generalizable findings.
- 12 • Bias will be reduced by filling all the CPS before the conduct of a computed  
13 tomography pulmonary angiography(CTPA), as well as blinding the results of CPS to  
14 the radiologists performing the CTPA.
- 15 • Robust statistical methods like the area under the receiver operating curve will be used  
16 to ascertain the test with the best diagnostic performance
- 17 • Its main limitation is the inability to objectively assess the expertise of radiologists  
18 who will interpret the CTPA results, which is a paramount determinant of the amount  
19 of confirm PE cases.

### 21 **Background**

22 Pulmonary embolism (PE) is a potentially lethal sequelae of venous thromboembolism (VTE)  
23 with a reported 30-day mortality rate varying between 14-44% [1–4]. It poses considerable  
24 diagnostic difficulties in clinical practice and especially in emergency medicine, due to the

1 polymorphism of its clinical manifestations and the lack of a pathognomic symptom or sign  
2 [5]. Hence, it is common for the diagnosis of PE to be easily overlooked [6,7] till necropsy  
3 where it has been reported in 53% of dead people who had an autopsy [8]. Consequently,  
4 clinicians have developed a high index of clinical suspicion of PE over the last decade [9].  
5 However, of all suspected PE patients, only 10-15% would be confirmed during diagnostic  
6 tests [10]. Overtesting leads to undue expenses, potential iatrogenic damages such as  
7 contrast-induced allergic reactions, contrast-induced nephropathy[11] or radiation-induced  
8 solid tumors [12] from multi-detector computed tomography pulmonary angiography  
9 (CTPA), its current gold standard diagnostic test [13]. In an attempt to remedy the problem of  
10 undue investigations, several clinical probability scores (CPS), among which the most widely  
11 used are the Wells[14], Simplified Wells[15], Revised Geneva [16], Simplified Revised  
12 Geneva [17] scores and the YEARS clinical decision rule[18], were put forth to guide the  
13 choice of diagnostic testing depending on the assessed PE probability (low, intermediate or  
14 high) [13]. Current guidelines recommend their use coupled with D-dimer to preclude patients  
15 with a low PE probability from further diagnostic tests, without compromising the patient's  
16 safety [13]. This diagnostic algorithm reduces the number of unnecessary CTPA by 35%, with  
17 only 1-2% of missed cases in the group of patients with a low PE probability [19]. This is of  
18 invaluable economic interest in resource-limited emergency departments (EDs) of sub-  
19 Saharan Africa (SSA) where CTPA, has recently been described to be financially and  
20 geographically inaccessible for the majority of patients with suspected PE [20].

21 Globally, EDs are at the forefront of the management of patients with suspected PE[21]. Here,  
22 prompt and accurate ruling in or out the diagnosis of PE is vital for the timely diagnosis and  
23 treatment of PE. As mentioned above, the diagnosis of PE begins with risk stratification  
24 through CPS to prevent patients with low PE probability from unnecessary further testings  
25 [13,21]. Although these clinical prediction models have been externally validated in high-

1  
2  
3 1 income countries where there were designed [22,23], the generalization of their validity to  
4  
5 2 SSA remains questionable due to lack of data in this regards. It is known that a CPS derived  
6  
7 3 in a particular setting often performs less well when applied in another setting [24–27] due to  
8  
9 4 discrepancies in disease prevalence and differences in clinicians' experiences of suspected  
10  
11 5 cases [24]. Thus, generalizing the external validity of CPS for PE to SSA without prior  
12  
13 6 evidence is inappropriate given that several studies have showed blacks to have a 30-60%  
14  
15 7 increase in the incidence of PE [28–30], as well as a 30 % increase in PE-related mortality  
16  
17 8 compared to other racial groups[31].  
18  
19  
20  
21  
22  
23  
24  
25  
26  
27  
28  
29  
30  
31  
32  
33  
34  
35  
36  
37  
38  
39  
40  
41  
42  
43  
44  
45  
46  
47  
48  
49  
50  
51  
52  
53  
54  
55  
56  
57  
58  
59  
60

## 10 **Objectives**

11 The study objectives will be to assess the diagnostic performance of the Original Wells,  
12 Simplified Wells, Revised Geneva, and the Simplified Revised Geneva (SRG) scores in a  
13 selected sub-Saharan African population admitted to the ED with clinical suspicion of PE.  
14

## 15 **Methods and analysis**

16 The final study will be reported in conformity to the Tripod checklist for prediction model  
17 validation.

## 18 ***Study design, setting and duration***

19 This will be a cross-sectional multicenter study carried out in the EDs of seven major referral  
20 hospital of Cameroon: the National Emergency Centre of Cameroon, the Gynaeco-obstetric  
21 and Paediatric Hospital of Yaoundé, the Yaoundé Central Hospital, the Yaoundé General  
22 Hospital, the University Hospital Centre of Yaounde, the Douala General Hospital and the  
23 Laquintinie Hospital of Douala between the period of July 1, 2019, and December 31, 2020.



1 The Gynaeco-obstetric and Paediatric Hospital of Yaoundé is specialized in the management  
2 of all maternal and child diseases irrespective of the mother's and child's age. The other six  
3 hospital are specialized in the management of all adults' as well of maternal and child  
4 diseases, irrespective of the adult's, mother's and child's ages. All seven hospitals are tertiary  
5 and university teaching hospitals in the cities of either Yaoundé and Douala of Cameroon.  
6 Averagely, each hospital manages 1000 patients per year.

### 7 *Patient eligibility criteria*

8 We will prospectively recruit all consecutive patients aged above 15 years who will be  
9 admitted to the aforementioned seven EDs for clinical suspicion of PE. Pregnant women will  
10 also be included. Case definition of clinical suspicion of PE will be any patient presenting  
11 with sudden dyspnoea, chest pain, haemoptysis or syncope. We will exclude patients who will  
12 refuse to consent, those who will not undergo CTPA to rule in or rule out PE despite clinical  
13 suspicion, patients with contraindications to CTPA (haemodynamic instability, dehydration,  
14 altered renal function) and those with a diagnosis of PE documented before ED admission.

### 15 *Sampling method*

16 Assuming a prevalence rate of PE of 61.5% in Africa[32], we used the Eng's formula[33] to  
17 obtain a minimum sample size of 364 participants through a consecutive sampling method.

### 18 *Study Procedure*

19 We will approach all consecutive patients admitted for clinical suspicion of PE to obtain  
20 informed consent. Using a pilot-tested interview administered questionnaire (supplementary  
21 1), each enrolled patient will be assess for PE clinically probability before any other test to  
22 avoid bias, using four CPS, namely; the original Wells score, the simplified Wells score, the  
23 Revised Geneva score, and the SRG Score. The YEARS clinical rule, a CPS, will not be

1  
2  
3 1 studied because it entails the measurement of D-dimers which is relatively expensive and not  
4  
5 2 available in all SSA laboratories[18]. Figure 1 illustrates the study procedure.  
6  
7

### 8 ***Definitions of Terms***

9

10  
11 4 Patients will be considered to have chronic heart failure, cancer, history of previous deep  
12  
13 5 venous thrombosis (DVT) or PE, or chronic pulmonary disease if these conditions will be  
14  
15 6 known before ED admission. Recent surgery will be defined as any surgical intervention  
16  
17 7 performed within the last four weeks before the patient's admission.  
18  
19

### 20 ***Diagnostic testing and assessment of potential sources of bias***

21

22  
23  
24  
25 9 The questionnaire will be filled and systematically reviewed for completeness before  
26  
27 10 proceeding to further diagnostic testing. After assessment of the clinical prediction of PE, all  
28  
29 11 patients with none of the aforementioned contraindications to CTPA, will undergo a CTPA to  
30  
31 12 either rule in or rule out the diagnosis of PE. The diagnosis of PE will be established by  
32  
33 13 CTPA detection of an embolus in the pulmonary vasculature. Radiologists performing the  
34  
35 14 CTPA will have a minimum of 10 years of clinical experience after qualifying to reduce the  
36  
37 15 chances of the radiologists missing out the diagnosis of PE. The results of the CPS will be  
38  
39 16 blinded to the radiologist to decrease the bias.  
40  
41  
42  
43

### 44 ***Data Management and Analysis***

45

46  
47 18 Using CTPA as the goal standard test, the sensitivity, specificity, positive predictive value,  
48  
49 19 negative predictive value and accuracy of each CPS will be calculated. The sensitivity of each  
50  
51 20 CPS will be calculated as the proportion of patients with CTPA confirmed PE who will have a  
52  
53 21 PE likely probability. The specificity of each the four CPS will be calculated as the proportion  
54  
55 22 of patients with CTPA unconfirmed PE who will have a PE unlikely score. The positive  
56  
57 23 predictive value will be calculated as the proportion of patients with PE likely score who will  
58  
59  
60

1  
2  
3 1 have CTPA confirmed PE. The negative predictive value of each CPS will be calculated as  
4  
5 2 the proportion of patients with PE unlikely score who will have a CTPA unconfirmed PE. The  
6  
7 3 accuracy of each CPS will be calculated as the proportion of true results (true positives and  
8  
9 4 true negatives) or the number of correct clinical assessments divided by the number of all  
10  
11 5 assessments. Data will be entered into the Statistical Package for Social Sciences (SPSS)  
12  
13 6 version 20.0 for analysis. Measures of discrimination such as the area under the curve (AUC)  
14  
15 7 and measures of calibration (calibration plots, Hosmer and Lemeshow statistics,  
16  
17 8 observed/expected event rates, etc) would be used to better ascertain the performance of each  
18  
19 9 CPS. Other analyses such as the net benefit or decision curve would also be measured. To  
20  
21 10 ease analysis the predictive models were dichotomized as follows: Original Wells scores  
22  
23 11 between 0-4 and  $> 4$  will be considered PE unlikely and PE likely respectively (Table 1);  
24  
25 12 Simplified Wells scores between  $\leq 1$  and  $> 1$  will be considered as PE unlikely and PE likely  
26  
27 13 respectively (Table 1); Revised Geneva scores between 0-5 and  $\geq 6$  will be considered PE  
28  
29 14 unlikely and PE likely respectively (Table 2); and a SRG scores between 0-2 and  $\geq 3$  will be  
30  
31 15 considered PE unlikely and PE likely respectively (Table 2).  
32  
33  
34  
35  
36  
37  
38  
39  
40  
41  
42

### 17 **Patient and Public Involvement**

18 Only patients admitted to the aforementioned seven EDs for suspicion of PE will be enrolled  
19 into this study.

### 20 **Ethics and dissemination**

21 Clearance has been granted by the Institutional Review Board of the Faculty of Medicine and  
22 Biomedical Sciences of the University of Yaounde I, Cameroon and the directorates of all  
23 participating hospitals to conduct this study. Also, informed consent will be sought from each

1 patient or their legal next of kin and parental consent will be obtained for all minors. The final  
2 study will be published in a peer-review journal and the findings presented to health  
3 authorities and the healthcare providers.

#### 4 **Discussion**

5 PE is the most life-threatening complication of VTE. A recent systematic review on the  
6 epidemiology of venous thromboembolism in Africa found that the prevalence of PE ranges  
7 between 0.14% to – 61.5%[32]. Furthermore, PE accounts for a mortality rate of 53% of  
8 autopsy reports [8]. These high prevalence rates and mortality rates of PE re-iterates the  
9 burden of disease it poses. The ill-health related to PE is further aggravated by the significant  
10 diagnostic challenge in clinical practice and particularly in emergency medicine, due to its  
11 polymorphic clinical presentations and absence of pathognomic clinical signs or symptoms.  
12 Hence, it is common for the diagnosis of PE to be easily missed out [6,7]. CTPA remains the  
13 imaging test to diagnose PE[13]. By paradox, the advent of CTPA let to a reduction in the  
14 prevalence of PE due to an overdiagnosis of PE as a result of an increased index of clinical  
15 suspicion of PE by clinicians[9]. However, CTPA is not void of complications. It may lead to  
16 contrast medium induced nephropathy[11] or radiation medium induced solid tumors [12]. To  
17 advert the sequelae of CTPA, sequential pretest testing using CPS have been introduced.  
18 Appreciate use of these CPS obviates the need of CTPA by 20 - 30%, with an overall 3-  
19 month diagnostic failure rate below 1.5%[18]. Although CPS are routinely used in EDs of  
20 low-resource settings, few studies have cited their external validity in SSA. We intend to use  
21 robust statistical methods with the measurement of discrimination such as area under the  
22 curve (AUC), measures of calibration (calibration plots, Hosmer and Lemeshow statistics,  
23 observed/expected event rates, etc), calculation of net benefit or decision curve which would  
24 help ascertain the CPS with the best diagnostic performance for PE amongst all the four CPS

1 assessed. The findings of this study may guide clinicians in making informed decisions in  
2 predicting PE diagnosis and identification of patients at the need of further testings or  
3 anticoagulants therapy in resource-challenged environments where CTPA is not always  
4 available or affordable to confirm the diagnosis of PE.

### 5 **List of Abbreviations**

6 ED : Emergency department ; CPS : Clinical probability score ; CTPA : computed  
7 tomography pulmonary angiography ; PE : Pulmonary embolism ; SSA : sub-Sahara Africa :  
8 SRG : Simplified Revised Geneva.

### 10 **Acknowledgments**

11 The authors thank all administrative staff of participating hospital for authorizing us to  
12 conduct this study.

13 **Competing interests:** The authors declare that they have no competing interests.

### 14 **Funding**

15 This study received no specific grant from any funding agency in the public, commercial or  
16 not-for-profit sectors.

17 **Authors' Contributions:** AE and JNT: Study protocol conception, design and manuscript  
18 writing. POE, JAMM and JZM: critically revised the manuscript for intellectual content. All  
19 authors read and approved the final manuscript.

20 **Competing interests:** The authors declare that they have no competing interests.

1  
2  
3 1 **Data statement** : All data relevant to the study are included in the article or uploaded as  
4  
5 2 supplementary information. Any other information are available on request from the  
6  
7 3 corresponding author at: joeltochie@gmail.com.  
8  
9  
10  
11 4

## 13 5 **References**

- 15 6 1. Mantilla CB, Horlocker TT, Schroeder DR, Berry DJ, Brown DL. Frequency of  
16 7 myocardial infarction, pulmonary embolism, deep venous thrombosis, and death  
17 8 following primary hip or knee arthroplasty. *Anesthesiology*. 2002;1140–6.
- 19 9 2. Comfere TB, Sprung J, Case KA, Dye PT, Johnson JL, Hall BA, et al. Predictors of  
20 10 mortality following symptomatic pulmonary embolism in patients undergoing  
21 11 noncardiac surgery. *Can J Anaesth*. 2007;54(8):634–41.
- 24 12 3. Sakon M, Kakkar AK, Ikeda M, Sekimoto M, Nakamori S, Yano M, et al. Current  
25 13 status of pulmonary embolism in general surgery in Japan. *Surg Today*. 2004;805–10.
- 27 14 4. Heit JA, Silverstein MD, Mohr DN, Petterson TM, O’Fallon WM, Melton LJ 3rd.  
28 15 Predictors of survival after deep vein thrombosis and pulmonary embolism: a  
29 16 population-based, cohort study. *Arch Intern Med*. 1999;445–53.
- 31 17 5. Jan Belohlavek, Vladimír Dytrych, Ales Linhart. Pulmonary embolism, part I:  
32 18 Epidemiology, risk factors and risk stratification, pathophysiology, clinical presentation,  
33 19 diagnosis and nonthrombotic pulmonary embolism. *Exp Clin Cardiol*. 2013;129–38.
- 36 20 6. Barais M, Morio N, Cuzon Breton A, et al. “I can’t find anything wrong: it must be a  
37 21 pulmonary embolism”: diagnosing suspected pulmonary embolism in primary care, a  
38 22 qualitative study. *PLoS One* 2014;9:e98112.
- 41 23 7. Schiff GD, Hasan O, Kim S, Abrams R, Cosby K, Lambert BL, et al. Diagnostic error in  
42 24 medicine: analysis of 583 physician-reported errors. *Arch Intern Med*.  
43 25 2009;169(20):1881–7.
- 45 26 8. Lindblad B, Eriksson A, Bergqvist D. Autopsy-verified pulmonary embolism in a  
46 27 surgical department: analysis of the period from 1951 to 1988. *Br J Surg*. 1991;1849–52.
- 48 28 9. Wiener RS, Schwartz LM, Woloshin S. Time Trends in Pulmonary Embolism in the  
49 29 United States: Evidence of Overdiagnosis. *Arch Intern Med*. 2011;171(9):831–7.
- 51 30 10. Le Gal G, Bounameaux H. Diagnosing pulmonary embolism: running after the  
52 31 decreasing prevalence of cases among suspected patients. *J Thromb Haemost*.  
53 32 2004;2(8):1244–6.
- 56 33 11. Mitchell AM, Kline JA. Contrast nephropathy following computed tomography  
57 34 angiography of the chest for pulmonary embolism in the emergency department. *J*  
58 35 *Thromb Haemost*. 2007;50–4.

12. Cochran ST, Bomyea K, Sayre JW. Trends in adverse events after IV administration of contrast media. *Am J Roentgenol.* 2001;1385–8.
13. Konstantinides SV, Torbicki A, Agnelli G, Danchin N, Fitzmaurice D, Galiè N, et al. 2014 ESC Guidelines on the diagnosis and management of acute pulmonary embolism: The Task Force for the Diagnosis and Management of Acute Pulmonary Embolism of the European Society of Cardiology (ESC) Endorsed by the European Respiratory Society (ERS). *Eur Heart J.* 2014;35(43):3033–73.
14. Wells PS, Ginsberg JS, Anderson DR, Kearon C, Gent M, Turpie AG, et al. Use of a clinical model for safe management of patients with suspected pulmonary embolism. *Ann Intern Med.* 1998;997–1005.
15. Wells PS, Anderson DR, Rodger M, Ginsberg JS, Kearon C, Gent M, et al. Derivation of a simple clinical model to categorize patient's probability of pulmonary embolism: increasing the model's utility with the SimpliRED d-dimer. *Thromb Haemost.* 2000;416–420.
16. Le Gal G, Righini M, Roy PM, Sanchez O, Aujesky D, Bounameaux H, et al. Prediction of pulmonary embolism in the emergency department: the revised Geneva score. *Ann Intern Med.* 2006;165–71.
17. Kline JA, Nelson RD, Jackson RE, Courtney DM. Criteria for the safe use of d-dimer testing in emergency department patients with suspected pulmonary embolism: a multicenter US study. *Ann Emerg Med.* 2002;144–152.
18. van der Hulle T, Cheung WY, Kooij S, Beenen LFM, van Bommel T, van Es J, et al. Simplified diagnostic management of suspected pulmonary embolism (the YEARS): a prospective, multicentre, cohort study. *Lancet* 2017;390:289-97.
19. Lucassen W, Geersing G-J, Erkens PMG, Reitsma JB, Moons KGM, Büller H, et al. Clinical Decision Rules for Excluding Pulmonary Embolism: A Meta-analysis. *Ann Intern Med.* 2011;155(7):448.
20. Joshua Tambe, Boniface Moifo, Emmanuel Fongang, Emilienne Guegang, Alain Georges Juimo. Acute pulmonary embolism in the era of multi-detector CT: a reality in sub-Saharan Africa. *BMC Medical Imaging.* 2012;31.
21. Hendriksen JMT, Geersing GJ, Lucassen WAM, Erkens PMG, Stoffers HEJH, van Weert HCPM, et al. Diagnostic prediction models for suspected pulmonary embolism: systematic review and independent external validation in primary care. *BMJ* 2015;351:101hhh;3.
22. Righini M, Bounameaux H. External validation and comparison of recently described prediction rules for suspected pulmonary embolism. *Curr Opin Pulm Med.* 2004;345–9.
23. Hendriksen J M T, Geersing G J, Lucassen W A M, Erkens P M G, Stoffers H E J H, van Weert H C P M, et al. Diagnostic prediction models for suspected pulmonary embolism: systematic review and independent external validation in primary care. *BMJ.* 2015;h4438.

- 1  
2  
3 1 24. Moons KGM, Kengne AP, Grobbee DE, Royston P, Vergouwe Y, Altman DG, et al.  
4 2 Risk prediction models: II. External validation, model updating, and impact assessment.  
5 3 Heart. 2012;98(9):691–8.  
6  
7 4 25. Altman DG, Royston P. What do we mean by validating a prognostic model? Stat Med.  
8 5 2000;19(4):453–73.  
9  
10 6 26. Reilly BM, Evans AT. Translating clinical research into clinical practice: impact of  
11 7 using prediction rules to make decisions. Ann Intern Med. 2006;144(3):201–9.  
12  
13 8 27. Justice AC, Covinsky KE, Berlin JA. Assessing the generalizability of prognostic  
14 9 information. Ann Intern Med. 1999;130(6):515–24.  
15  
16 10 28. White RH, Keenan CR. Effects of race and ethnicity on the incidence of venous  
17 11 thromboembolism. Thromb Res. 2009;S11–S17.  
18  
19 12 29. Zakai N, Lutsey P, Folsom A, Cushman M. Black-white differences in venous  
20 13 thrombosis risk: the Longitudinal Investigation of Thromboembolism Etiology (LITE).  
21 14 Blood ASH Annual Meeting Abstracts. 2010;478.  
22  
23 15 30. Schneider D, Lilienfeld DE, Wansoo Im. The Epidemiology of Pulmonary Embolism:  
24 16 Racial Contrasts in Incidence and In-Hospital Case Fatality. JOURNAL OF THE  
25 17 NATIONAL MEDICAL ASSOCIATION. 2006;1967–72.  
26  
27 18 31. Ibrahim SA, Stone RA, Obrosky DS, Sartorius J, Fine MJ, Aujesky D. Racial  
28 19 Differences in 30-Day Mortality for Pulmonary Embolism. Am J Public Health.  
29 20 2006;96(12):2161–4.  
30  
31 21 32. Danwang C, Temgoua MN, Agbor VN, Tankeu AT, Noubiap JJ. Epidemiology of  
32 22 venous thromboembolism in Africa: a systematic review. J Thromb Haemost  
33 23 2017;15:1770-1781.  
34  
35 24 33. Eng J. Sample size estimations: How many individuals should be studied? Radiology.  
36 25 2003;309–13.  
37  
38  
39  
40  
41  
42  
43  
44  
45  
46  
47  
48

28 **Table 1: The Original Wells score and Simplified Wells score for Pulmonary embolism**

| Predictive variables                      | Original Wells score        | Simplified Wells score      |
|-------------------------------------------|-----------------------------|-----------------------------|
| Previous PE or DVT                        | 1.5                         | 1                           |
| Heart rate > 100 bpm                      | 1.5                         | 1                           |
| Recent surgery or immobilization          | 1.5                         | 1                           |
| Clinical signs of DVT                     | 3                           | 1                           |
| Alternative diagnosis less likely than PE | 3                           | 1                           |
| Haemoptysis                               | 1                           | 1                           |
| Cancer                                    | 1                           | 1                           |
|                                           | <b>Pretest probability;</b> | <b>Pretest probability;</b> |
|                                           | 0 – 1: low                  | ≤ 1: PE unlikely (low)      |
|                                           | 2– 6: moderate              | >1: PE likely (high)        |



$\geq 7$  : high  
**Dichotomized score:**  
 $\leq 4$ : PE unlikely (low)  
 $>4$ : PE likely (high)

---

DVT: Deep venous thrombosis    PE: Pulmonary embolism

1  
2  
3  
4  
5  
6  
7  
8  
9  
10  
11  
12  
13  
14  
15  
16  
17  
18  
19  
20  
21  
22  
23  
24  
25  
26  
27  
28  
29  
30  
31  
32  
33  
34  
35  
36  
37  
38  
39  
40  
41  
42  
43  
44  
45  
46  
47  
48  
49  
50  
51  
52  
53  
54  
55  
56  
57  
58  
59  
60

For peer review only

**Table 2: The Revised Geneva score and Simplified Revised Geneva score for Pulmonary embolism**

| Predictive variables                                          | Revised Geneva score | Simplified Revised Geneva score |
|---------------------------------------------------------------|----------------------|---------------------------------|
| Age > 65 years                                                | 1                    | 1                               |
| Active malignancy (or considered cure < 1 year )              | 2                    | 1                               |
| Recent surgery or fracture of the lower limbs within 1 month  | 2                    | 1                               |
| Previous PE or DVT                                            | 3                    | 1                               |
| Haemoptysis                                                   | 2                    | 1                               |
| Unilateral lower limb pain                                    | 3                    | 1                               |
| Tenderness on lower limb deep venous palpation and unilateral | 4                    | 1                               |

|    |                             |                             |                             |
|----|-----------------------------|-----------------------------|-----------------------------|
| 1  |                             |                             |                             |
| 2  |                             |                             |                             |
| 3  | oedema                      |                             |                             |
| 4  | Heart rate                  |                             |                             |
| 5  | 75 – 94 bpm                 | 3                           | 1                           |
| 6  | ≥ 95 bpm                    | 5                           | 2                           |
| 7  |                             | <b>Pretest probability;</b> | <b>Pretest probability;</b> |
| 8  |                             | 0 – 3: low                  | 0 – 1: low                  |
| 9  |                             | 4– 10: moderate             | 2– 4: moderate              |
| 10 |                             | ≥ 11 : high                 | ≥ 5 : high                  |
| 11 |                             | <b>Dichotomized score:</b>  | <b>Dichotomized score:</b>  |
| 12 |                             | 0 - 5: PE unlikely (low)    | 0 - 2: PE unlikely (low)    |
| 13 |                             | ≥ 6: PE likely (high)       | ≥ 3: PE likely (high)       |
| 14 | <hr/>                       |                             |                             |
| 14 | DVT: Deep venous thrombosis | PE: Pulmonary embolism      |                             |

1

2

3 **Figure legend/caption**

4 Table 1: The Original Wells score and Simplified Wells score for Pulmonary embolism

5 Table 2: The Revised Geneva score and Simplified Revised Geneva score for Pulmonary  
6 embolism

7 Figure 1 : A flow chart illustrating the study procedure.

8 supplementary 1 : Questionnaire

9

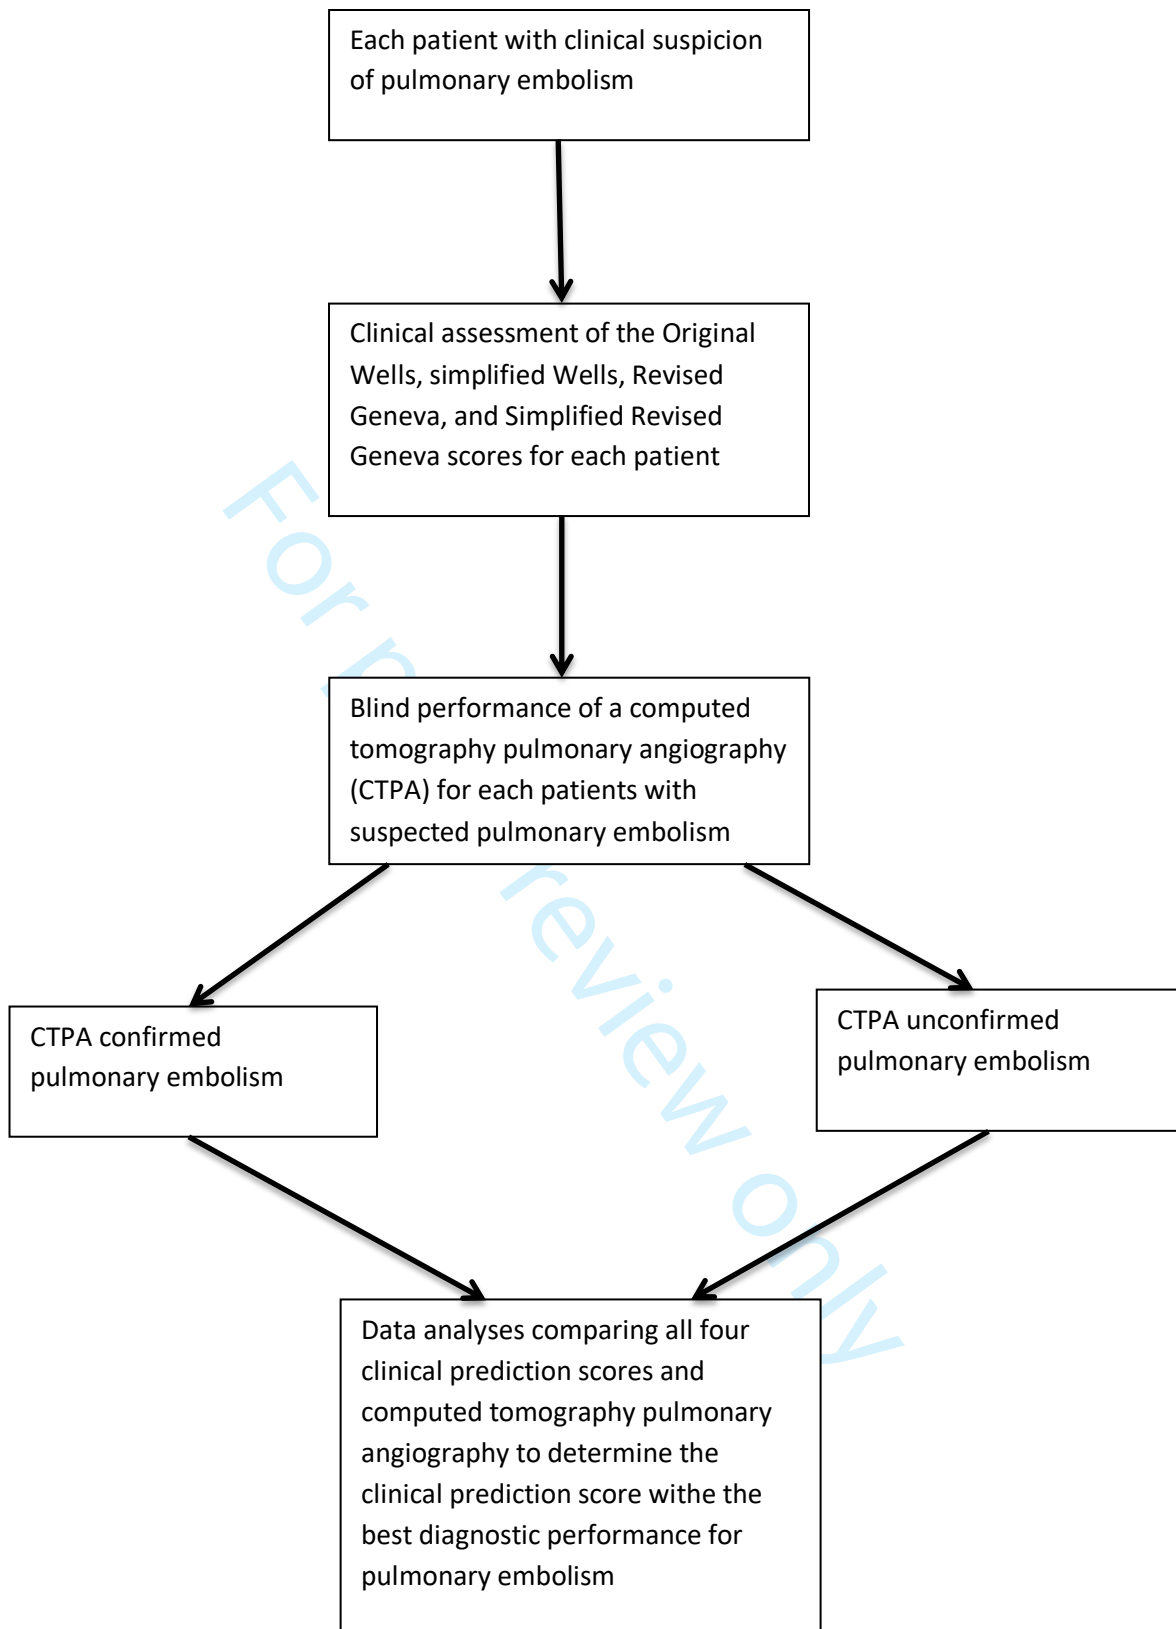

Figure 1 : A flow chart illustrating the study procedure.

**Data collection form**

1-Patient identification number .....

2-Name of patient.....

3- Patient's phone number.....

4-Next of kin phone's number .....

5Age of patient.....

6-Gender: M  F 

7-Date of admission.....

**SECTION B – Presenting complaints**12-Presenting complaint : chest pain  syncope  Dyspnoea  haemoptysis 

If others precise : .....

13- Duration of symptoms before admission:.....

**SECTION C – Past History**14- Medical: Yes  No If yes Hypertension  Diabetes  HIV  Deep venous thrombosis  Pulmonary embolism   
Stroke  cancer  others :.....15- Surgery within the last month: Yes  No 16-Other predisposing factors : Obesity  prolonged trps  Use of hormonal contraceptives   
Specify if others:.....**SECTION C – Physical examination**17-Vital sigs: Blood pressure.....mmHg Pulse.....beats per min respiratory rate .....breat  
per min SPO<sub>2</sub>.....% Temperature.....°C**SECTION D– Evaluation of clinical probability scores for pulmonary embolism**

18- Original Wells et simplified Wells scores (circle the criteria found in the patient)

| Questions                                                       | Original Wells score | Simplified Wells score |
|-----------------------------------------------------------------|----------------------|------------------------|
| Previous thromboembolic disease                                 | 1.5                  | 1                      |
| Heart rate > 100 beats per minute                               | 1.5                  | 1                      |
| Immobilization: bedrest ≥ 3 days or Surgery in the last 4 weeks | 1.5                  | 1                      |
| Signs and symptoms of deep venous thrombosis                    | 3                    | 1                      |
| Diagnostic alternative less likely than pulmonary embolism      | 3                    | 1                      |

|                                                                                             |   |                          |   |                          |
|---------------------------------------------------------------------------------------------|---|--------------------------|---|--------------------------|
| Hemoptysis                                                                                  | 1 |                          | 1 |                          |
| Malignancy: cancer treatment currently or in the last 6 months or receiving palliative care | 1 | <input type="checkbox"/> | 1 | <input type="checkbox"/> |

---

|                    |                             |                                |
|--------------------|-----------------------------|--------------------------------|
| <b>Total Score</b> | <b>Pretest probability;</b> | <b>Probabilite du pretest;</b> |
|                    | 0 – 1: low                  | ≤ 1: PE unlikely (low)         |
|                    | 2– 6: moderate              | >1: PE likely (high)           |
|                    | ≥ 7 : high                  |                                |
|                    | <b>Dichotomized score:</b>  |                                |
|                    | ≤ 4: PE unlikely (low)      |                                |
|                    | >4: PE likely (high)        |                                |

DVT: Deep venous thrombosis PE: Pulmonary embolism

**19- The Revised Geneva score and Simplified Revised Geneva score for Pulmonary embolism**  
(circle the criteria found in the patient)

| Predictive variables                                                 | Revised Geneva score        | Simplified Revised Geneva score |
|----------------------------------------------------------------------|-----------------------------|---------------------------------|
| Age > 65 years                                                       | 1                           | 1                               |
| Active malignancy (or considered cure < 1 year )                     | 2                           | 1                               |
| Recent surgery or fracture of the lower limbs within 1 month         | 2                           | 1                               |
| Previous PE or DVT                                                   | 3                           | 1                               |
| Haemoptysis                                                          | 2                           | 1                               |
| Unilateral lower limb pain                                           | 3                           | 1                               |
| Tenderness on lower limb deep venous palpation and unilateral oedema | 4                           | 1                               |
| Heart rate                                                           |                             |                                 |
| 75 – 94 bpm                                                          | 3                           | 1                               |
| ≥ 95 bpm                                                             | 5                           | 2                               |
|                                                                      | <b>Pretest probability;</b> | <b>Pretest probability;</b>     |
|                                                                      | 0 – 3: low                  | 0 – 1: low                      |
|                                                                      | 4– 10: moderate             | 2– 4: moderate                  |
|                                                                      | ≥ 11 : high                 | ≥ 5 : high                      |
|                                                                      | <b>Dichotomized score:</b>  | <b>Dichotomized score:</b>      |
|                                                                      | 0 - 5: PE unlikely (low)    | 0 - 2: PE unlikely (low)        |
|                                                                      | ≥ 6: PE likely (high)       | ≥ 3: PE likely (high)           |

DVT: Deep venous thrombosis PE: Pulmonary embolism

**20- Differential Diagnoses evoked:** Pulmonary embolism  Acute coronary syndrome

Others:.....

**SECTION E – Findings on computed tomography angiography**

21-Dilated right ventricle: Yes  No

22-Leftward deviation of the interventricular septum : Yes  No

1  
2  
3  
4  
5  
6  
7  
8  
9  
10  
11  
12  
13  
14  
15  
16  
17  
18  
19  
20  
21  
22  
23  
24  
25  
26  
27  
28  
29  
30  
31  
32  
33  
34  
35  
36  
37  
38  
39  
40  
41  
42  
43  
44  
45  
46  
47  
48  
49  
50  
51  
52  
53  
54  
55  
56  
57  
58  
59  
60

24-A thrombus seen in the pulmonary vessels: Yes  No

25-Other Findings:.....

26-Conclusion of CT-scan results : Pulmonary embolism : Yes  No

For peer review only

STROBE Statement—Checklist of items that should be included in reports of *cross-sectional studies*

|                              | Item No | Recommendation                                                                                                                                                                                                                                                                                                                                                                                                |                                                 |
|------------------------------|---------|---------------------------------------------------------------------------------------------------------------------------------------------------------------------------------------------------------------------------------------------------------------------------------------------------------------------------------------------------------------------------------------------------------------|-------------------------------------------------|
| <b>Title and abstract</b>    | 1       | (a) Indicate the study's design with a commonly used term in the title or the abstract<br>(b) Provide in the abstract an informative and balanced summary of what was done and what was found                                                                                                                                                                                                                 | page 2<br>page 2                                |
| <b>Introduction</b>          |         |                                                                                                                                                                                                                                                                                                                                                                                                               |                                                 |
| Background/rationale         | 2       | Explain the scientific background and rationale for the investigation being reported                                                                                                                                                                                                                                                                                                                          | page 3 to 5                                     |
| Objectives                   | 3       | State specific objectives, including any prespecified hypotheses                                                                                                                                                                                                                                                                                                                                              | Page 5                                          |
| <b>Methods</b>               |         |                                                                                                                                                                                                                                                                                                                                                                                                               |                                                 |
| Study design                 | 4       | Present key elements of study design early in the paper                                                                                                                                                                                                                                                                                                                                                       | Page 5                                          |
| Setting                      | 5       | Describe the setting, locations, and relevant dates, including periods of recruitment, exposure, follow-up, and data collection                                                                                                                                                                                                                                                                               | Page 5                                          |
| Participants                 | 6       | (a) Give the eligibility criteria, and the sources and methods of selection of participants                                                                                                                                                                                                                                                                                                                   | Page 6                                          |
| Variables                    | 7       | Clearly define all outcomes, exposures, predictors, potential confounders, and effect modifiers. Give diagnostic criteria, if applicable                                                                                                                                                                                                                                                                      | 6 to 8                                          |
| Data sources/<br>measurement | 8*      | For each variable of interest, give sources of data and details of methods of assessment (measurement). Describe comparability of assessment methods if there is more than one group                                                                                                                                                                                                                          | 7                                               |
| Bias                         | 9       | Describe any efforts to address potential sources of bias                                                                                                                                                                                                                                                                                                                                                     | 7                                               |
| Study size                   | 10      | Explain how the study size was arrived at                                                                                                                                                                                                                                                                                                                                                                     |                                                 |
| Quantitative variables       | 11      | Explain how quantitative variables were handled in the analyses. If applicable, describe which groupings were chosen and why                                                                                                                                                                                                                                                                                  | 6<br>7 and 8                                    |
| Statistical methods          | 12      | (a) Describe all statistical methods, including those used to control for confounding<br>(b) Describe any methods used to examine subgroups and interactions<br>(c) Explain how missing data were addressed<br>(d) If applicable, describe analytical methods taking account of sampling strategy<br>(e) Describe any sensitivity analyses                                                                    | 7 and 8<br>7 and 8<br>N/A<br>7 and 8<br>7 and 8 |
| <b>Results</b>               |         |                                                                                                                                                                                                                                                                                                                                                                                                               |                                                 |
| Participants                 | 13*     | (a) Report numbers of individuals at each stage of study—eg numbers potentially eligible, examined for eligibility, confirmed eligible, included in the study, completing follow-up, and analysed<br>(b) Give reasons for non-participation at each stage<br>(c) Consider use of a flow diagram                                                                                                               | N/A<br>N/A<br>N/A                               |
| Descriptive data             | 14*     | (a) Give characteristics of study participants (eg demographic, clinical, social) and information on exposures and potential confounders<br>(b) Indicate number of participants with missing data for each variable of interest                                                                                                                                                                               | N/A<br>N/A                                      |
| Outcome data                 | 15*     | Report numbers of outcome events or summary measures                                                                                                                                                                                                                                                                                                                                                          | N/A                                             |
| Main results                 | 16      | (a) Give unadjusted estimates and, if applicable, confounder-adjusted estimates and their precision (eg, 95% confidence interval). Make clear which confounders were adjusted for and why they were included<br>(b) Report category boundaries when continuous variables were categorized<br>(c) If relevant, consider translating estimates of relative risk into absolute risk for a meaningful time period | N/A<br>N/A<br>N/A                               |
| Other analyses               | 17      | Report other analyses done—eg analyses of subgroups and interactions, and sensitivity analyses                                                                                                                                                                                                                                                                                                                | N/A                                             |

1  
2  
3  
4  
5  
6  
7  
8  
9  
10  
11  
12  
13  
14  
15  
16  
17  
18  
19  
20  
21  
22  
23  
24  
25  
26  
27  
28  
29  
30  
31  
32  
33  
34  
35  
36  
37  
38  
39  
40  
41  
42  
43  
44  
45  
46  
47  
48  
49  
50  
51  
52  
53  
54  
55  
56  
57  
58  
59  
60

|                          |    |                                                                                                                                                                            |     |
|--------------------------|----|----------------------------------------------------------------------------------------------------------------------------------------------------------------------------|-----|
| <b>Discussion</b>        |    |                                                                                                                                                                            | N/A |
| Key results              | 18 | Summarise key results with reference to study objectives                                                                                                                   | N/A |
| Limitations              | 19 | Discuss limitations of the study, taking into account sources of potential bias or imprecision. Discuss both direction and magnitude of any potential bias                 | N/A |
| Interpretation           | 20 | Give a cautious overall interpretation of results considering objectives, limitations, multiplicity of analyses, results from similar studies, and other relevant evidence | N/A |
| Generalisability         | 21 | Discuss the generalisability (external validity) of the study results                                                                                                      | N/A |
| <b>Other information</b> |    |                                                                                                                                                                            |     |
| Funding                  | 22 | Give the source of funding and the role of the funders for the present study and, if applicable, for the original study on which the present article is based              | N/A |

\*Give information separately for exposed and unexposed groups.

**Note:** An Explanation and Elaboration article discusses each checklist item and gives methodological background and published examples of transparent reporting. The STROBE checklist is best used in conjunction with this article (freely available on the Web sites of PLoS Medicine at <http://www.plosmedicine.org/>, Annals of Internal Medicine at <http://www.annals.org/>, and Epidemiology at <http://www.epidem.com/>). Information on the STROBE Initiative is available at [www.strobe-statement.org](http://www.strobe-statement.org).



# BMJ Open

## The validity of four clinical prediction scores for pulmonary embolism in a sub-Saharan African setting: a protocol for a multicentre Cameroonian cross-sectional study.

|                                 |                                                                                                                                                                                                                                                                                                                                                                                                                                                                                                                                                                   |
|---------------------------------|-------------------------------------------------------------------------------------------------------------------------------------------------------------------------------------------------------------------------------------------------------------------------------------------------------------------------------------------------------------------------------------------------------------------------------------------------------------------------------------------------------------------------------------------------------------------|
| Journal:                        | <i>BMJ Open</i>                                                                                                                                                                                                                                                                                                                                                                                                                                                                                                                                                   |
| Manuscript ID                   | bmjopen-2019-031322.R2                                                                                                                                                                                                                                                                                                                                                                                                                                                                                                                                            |
| Article Type:                   | Protocol                                                                                                                                                                                                                                                                                                                                                                                                                                                                                                                                                          |
| Date Submitted by the Author:   | 29-Aug-2019                                                                                                                                                                                                                                                                                                                                                                                                                                                                                                                                                       |
| Complete List of Authors:       | Esiéné, Agnès ; Universite de Yaounde I Faculte de Medecine et des Sciences Biomedicales, Department of Anesthesiology and Critical Care<br>Owono Etoundi, Paul ; University of Yaoundé I, Department of Anesthesiology and Critical Care<br>Tochie, Joel Noutakdie; Universite de Yaounde I Faculte de Medecine et des Sciences Biomedicales,<br>Mbengono Metogo, Junette Arlette ; University of Yaoundé I, Department of Anesthesiology and Critical Care<br>Ze Minkande, Jacqueline; University of Yaounde I, Department of Anesthesiology and Critical Care, |
| <b>Primary Subject Heading</b>: | Emergency medicine                                                                                                                                                                                                                                                                                                                                                                                                                                                                                                                                                |
| Secondary Subject Heading:      | Cardiovascular medicine, Respiratory medicine                                                                                                                                                                                                                                                                                                                                                                                                                                                                                                                     |
| Keywords:                       | pulmonary embolism, Wells score, Simplified Wells score, Revised Geneva score, Simplified Revised Geneva score, emergency department                                                                                                                                                                                                                                                                                                                                                                                                                              |
|                                 |                                                                                                                                                                                                                                                                                                                                                                                                                                                                                                                                                                   |

SCHOLARONE™  
Manuscripts

1  
2  
3 1 **The validity of four clinical prediction scores for pulmonary embolism in a sub-Saharan**  
4  
5 2 **African setting: a protocol for a multicentre Cameroonian cross-sectional study.**  
6  
7

8  
9 3  
10 4 **Authors :** Agnès Esiéné<sup>1,2</sup>, Paul Owono Etoundi<sup>1,2</sup>, Joel Noutakdie Tochie<sup>1</sup>, Junette Arlette  
11 5 Mbengono Metogo<sup>1,3</sup>, Jacqueline Ze Minkande<sup>1,4</sup>  
12 6

13  
14 7 **Affiliations:**

15  
16 8 <sup>1</sup>Department of Anesthesiology and Critical Care, Faculty of Medicine and Biomedical  
17 9 Sciences, University of Yaoundé I, Yaoundé, Cameroon

18  
19 10 <sup>2</sup> Department of Emergency medicine, Anesthesiology and Critical Care, Yaounde Central  
20 11 Hospital, Yaoundé, Cameroon.

21  
22 12 <sup>3</sup>Department of Emergency medicine, Anesthesiology and Critical Care, Douala General  
23 13 Hospital, Douala, Cameroon

24  
25 14 <sup>4</sup>Department of Anesthesiology and Critical Care, Gynaeco-Obstetrics and Paediatric  
26 15 Hospital, Yaoundé, Cameroon.

27  
28 16 **Author's e-mail:** Agnès Esiéné: eseineagnes@gmail.com; Joel Noutakdie Tochie:  
29 17 joeltochie@gmail.com; Paul Owono Etoundi: owonop@yahoo.com; Junette Arlette  
30 18 Mbengono Metogo : junetmel@yahoo.com; Jacqueline Ze Minkande:  
31 19 minkandeze@yahoo.com  
32  
33  
34  
35  
36  
37  
38  
39  
40  
41  
42

43 21 **Corresponding author:** Dr. Joel Noutakdie Tochie, Faculty of Medicine and Biomedical  
44 22 Sciences, University of Yaoundé I, Yaoundé, Cameroon. Email: joeltochie@gmail.com.  
45 23 Telephone: (237) 676 55 88 25  
46  
47  
48  
49

50 24 **Word count;** abstract: 297 words; manuscript: 2334 words  
51  
52  
53  
54  
55  
56  
57  
58  
59  
60 27

## 1 **Abstract**

2 **Introduction:** Pulmonary embolism poses one of the most challenging diagnoses in medicine.  
3 Resolving these diagnostic difficulties is more crucial in emergency departments where fast  
4 and accurate decisions are needed for a life-saving purpose. Here, clinical pre-test evaluation  
5 is an important step in the diagnostic algorithm of pulmonary embolism. Although clinical  
6 probability scores are widely used in emergency departments of sub-Saharan Africa, no study  
7 has cited their diagnostic performance in this resource-constrained environment. This study  
8 will seek to assess the performance of four routinely used clinical prediction models in  
9 Cameroonians presenting with suspicion of pulmonary embolism at the emergency  
10 department.

11 **Methods and analysis:** It will be a cross-sectional study comparing the sensitivity,  
12 specificity, positive and negative predictive values and accuracy of the Wells, Simplified  
13 Wells, Revised Geneva and the Simplified Revised Geneva Scores to computed tomography  
14 pulmonary angiography as gold standard in all consecutive consenting patients aged above 15  
15 years admitted for clinical suspicion of pulmonary embolism to the emergency departments of  
16 seven major referral hospitals of Cameroon between July 1, 2019, and December 31, 2020.  
17 The area under the receiver operating curve, calibration plots, Hosmer and Lemeshow  
18 statistics, observed/expected event rates, net benefit and decision curve will be measured of  
19 each the clinical prediction test to ascertain the clinical score with the best diagnostic  
20 performance.

21 **Ethics and dissemination:** Clearance has been obtained from the Institutional Review Board  
22 of the Faculty of medicine and biomedical sciences of the University of Yaounde I, Cameroon  
23 and the directorates of all participating hospitals to conduct this study. Also, informed consent  
24 will be sought from each patient or their legal next of kin and parents for minors, before

1 enrollment into this study. The final study will be published in a peer-review journal and the  
2 findings presented to health authorities and healthcare providers.

3 **Keywords:** pulmonary embolism, Wells score, Simplified Wells score, Revised Geneva  
4 score, Simplified Revised Geneva score, emergency department, African.

### 6 **Strengths and Limitations of the study:**

- 7 • This is the first study to assess the diagnostic performance of four routine clinical  
8 probability scores (CPS) for pulmonary embolism (PE) in sub-Saharan Africa, hence,  
9 may provide an insight on the CPS with the best diagnostic performance.
- 10 • Bias will be reduced by filling all the CPS before the conduct of a computed  
11 tomography pulmonary angiography(CTPA), as well as blinding the results of CPS to  
12 the radiologists performing the CTPA.
- 13 • Robust statistical methods like the area under the receiver operating curve will be used  
14 to ascertain the test with the best diagnostic performance
- 15 • Its main limitation is the inability to objectively assess the expertise of radiologists  
16 who will interpret the CTPA results, which is a paramount determinant of the amount  
17 of confirmed PE cases.
- 18 • Another drawback is the exclusion of D-dimer measurements which are of great  
19 significance in risk stratification of PE.

### 21 **Background**

22 Pulmonary embolism (PE) is a potentially lethal sequela of venous thromboembolism (VTE)  
23 with a reported 30-day mortality rate varying between 14-44% [1–4]. It poses considerable  
24 diagnostic difficulties in clinical practice and especially in emergency medicine, due to the

1 polymorphism of its clinical manifestations and the lack of a pathognomic symptom or sign  
2 [5]. Hence, it is common for the diagnosis of PE to be easily overlooked [6,7] till necropsy  
3 where it has been reported in 53% of dead people who had an autopsy [8]. Consequently,  
4 clinicians have developed a high index of clinical suspicion of PE over the last decade [9].  
5 However, of all suspected PE patients, only 10-15% would be confirmed during diagnostic  
6 tests [10]. Overtesting leads to undue expenses, potential iatrogenic damages such as  
7 contrast-induced allergic reactions, contrast-induced nephropathy[11] or radiation-induced  
8 solid tumors [12] from multi-detector computed tomography pulmonary angiography  
9 (CTPA), its current gold standard diagnostic test [13]. In an attempt to remedy the problem of  
10 undue investigations, several clinical probability scores (CPS), among which the most widely  
11 used are the Wells[14], Simplified Wells[15], Revised Geneva [16], Simplified Revised  
12 Geneva [17] scores and the YEARS clinical decision rule[18], were put forth to guide the  
13 choice of diagnostic testing depending on the assessed PE probability (low, intermediate or  
14 high) [13]. Current guidelines recommend their use coupled with D-dimer to preclude patients  
15 with a low PE probability from further diagnostic tests, without compromising the patient's  
16 safety [13]. This diagnostic algorithm reduces the number of unnecessary CTPA by 35%, with  
17 only 1-2% of missed cases in the group of patients with a low PE probability [19]. This is of  
18 invaluable economic interest in resource-limited emergency departments (EDs) of sub-  
19 Saharan Africa (SSA) where CTPA, has recently been described to be financially and  
20 geographically inaccessible for the majority of patients with suspected PE [20].

21 Globally, EDs are at the forefront of the management of patients with suspected PE[21]. Here,  
22 prompt and accurate ruling in or out the diagnosis of PE is vital for the timely diagnosis and  
23 treatment of PE. As mentioned above, the diagnosis of PE begins with risk stratification  
24 through CPS to prevent patients with low PE probability from unnecessary further testings  
25 [13,21]. Although these clinical prediction models have been externally validated in high-

1  
2  
3 1 income countries where they were designed [22,23], the generalization of their validity to  
4  
5 2 SSA remains questionable due to lack of data in this regards. It is known that a CPS derived  
6  
7 3 in a particular setting often performs less well when applied in another setting [24–27] due to  
8  
9 4 discrepancies in disease prevalence and differences in clinicians' experiences of suspected  
10  
11 5 cases [24]. Thus, generalizing the external validity of CPS for PE to SSA without prior  
12  
13 6 evidence is inappropriate given that several studies have showed blacks to have a 30-60%  
14  
15 7 increase in the incidence of PE [28–30], as well as a 30 % increase in PE-related mortality  
16  
17 8 compared to other racial groups[31].  
18  
19  
20  
21  
22  
23  
24  
25  
26  
27  
28  
29  
30  
31  
32  
33  
34  
35  
36  
37  
38  
39  
40  
41  
42  
43  
44  
45  
46  
47  
48  
49  
50  
51  
52  
53  
54  
55  
56  
57  
58  
59  
60

## 10 **Objectives**

11 The study objectives will be to assess the diagnostic performance of the Original Wells,  
12 Simplified Wells, Revised Geneva, and the Simplified Revised Geneva (SRG) scores in a  
13 selected sub-Saharan African population admitted to the ED with clinical suspicion of PE.  
14

## 15 **Methods and analysis**

16 The final study will be reported in conformity to the Tripod checklist for prediction model  
17 validation.

## 18 ***Study design, setting and duration***

19 This will be a cross-sectional multicenter study carried out in the EDs of seven major referral  
20 hospitals of Cameroon: the National Emergency Centre of Cameroon, the Gynaeco-obstetric  
21 and Paediatric Hospital of Yaoundé, the Yaoundé Central Hospital, the Yaoundé General  
22 Hospital, the University Hospital Centre of Yaounde, the Douala General Hospital and the  
23 Laquintinie Hospital of Douala between the period of July 1, 2019, and December 31, 2020.

1 The Gynaeco-obstetric and Paediatric Hospital of Yaoundé is specialized in the management  
2 of all maternal and child diseases irrespective of the mother's and child's age. The other six  
3 hospitals are specialized in the management of all adults' as well of maternal and child  
4 diseases, irrespective of the adult's, mother's and child's ages. All seven hospitals are tertiary  
5 and university teaching hospitals in the cities of either Yaoundé and Douala of Cameroon.  
6 Averagely, each hospital manages 1000 patients per year.

### 7 *Patient eligibility criteria*

8 We will prospectively recruit all consecutive patients aged above 15 years who will be  
9 admitted to the aforementioned seven EDs for clinical suspicion of PE. Pregnant women will  
10 also be included. Case definition of clinical suspicion of PE will be any patient presenting  
11 with sudden dyspnoea, chest pain, haemoptysis or syncope. We will exclude patients who will  
12 refuse to consent, those who will not undergo CTPA to rule in or rule out PE despite clinical  
13 suspicion, patients with contraindications to CTPA (haemodynamic instability, dehydration,  
14 altered renal function) and those with a diagnosis of PE documented before ED admission.

### 15 *Sampling method*

16 Assuming a prevalence rate of 61.5% for PE in Africa[32], we used the Eng's formula[33] to  
17 obtain a minimum sample size of 364 participants through a consecutive sampling method.

### 18 *Study Procedure*

19 We will approach all consecutive patients admitted for clinical suspicion of PE to obtain  
20 informed consent. Using a pilot-tested interview administered questionnaire (supplementary  
21 1), each enrolled patient will be assessed for PE clinically probability before any other test to  
22 avoid bias, using four CPS, namely; the original Wells score, the simplified Wells score, the  
23 Revised Geneva score, and the SRG Score. The YEARS clinical rule, a CPS, will not be

1  
2  
3 1 studied because it entails the measurement of D-dimers which is relatively expensive and not  
4  
5 2 available in all SSA laboratories[18]. Figure 1 illustrates the study procedure.  
6  
7

### 8 ***Definitions of Terms***

9

10  
11 4 Patients will be considered to have chronic heart failure, cancer, history of previous deep  
12  
13 5 venous thrombosis (DVT) or PE, or chronic pulmonary disease if these conditions will be  
14  
15 6 known before ED admission. Recent surgery will be defined as any surgical intervention  
16  
17 7 performed within the last four weeks before the patient's admission.  
18  
19

### 20 ***Diagnostic testing and assessment of potential sources of bias***

21

22  
23  
24  
25 9 The questionnaire will be filled and systematically reviewed for completeness before  
26  
27 10 proceeding to further diagnostic testing. After assessment of the clinical prediction of PE, all  
28  
29 11 patients with none of the aforementioned contraindications to CTPA, will undergo a CTPA to  
30  
31 12 either rule in or rule out the diagnosis of PE. The diagnosis of PE will be established by  
32  
33 13 CTPA detection of an embolus in the pulmonary vasculature. Radiologists performing the  
34  
35 14 CTPA will have a minimum of 10 years of clinical experience after qualifying to reduce the  
36  
37 15 chances of the radiologists missing out the diagnosis of PE. The results of the CPS will be  
38  
39 16 blinded to the radiologist to decrease the bias.  
40  
41  
42  
43

### 44 ***Data Management and Analysis***

45

46  
47 18 Using CTPA as the goal standard test, the sensitivity, specificity, positive predictive value,  
48  
49 19 negative predictive value and accuracy of each CPS will be calculated. The sensitivity of each  
50  
51 20 CPS will be calculated as the proportion of patients with CTPA confirmed PE who will have a  
52  
53 21 PE likely probability. The specificity of each the four CPS will be calculated as the proportion  
54  
55 22 of patients with CTPA unconfirmed PE who will have a PE unlikely score. The positive  
56  
57 23 predictive value will be calculated as the proportion of patients with PE likely score who will  
58  
59  
60



1  
2  
3 1 have CTPA confirmed PE. The negative predictive value of each CPS will be calculated as  
4  
5 2 the proportion of patients with PE unlikely score who will have a CTPA unconfirmed PE. The  
6  
7 3 accuracy of each CPS will be calculated as the proportion of true results (true positives and  
8  
9 4 true negatives) or the number of correct clinical assessments divided by the number of all  
10  
11 5 assessments. Data will be entered into the Statistical Package for Social Sciences (SPSS)  
12  
13 6 version 20.0 for analysis. Measures of discrimination such as the area under the curve (AUC)  
14  
15 7 and measures of calibration (calibration plots, Hosmer and Lemeshow statistics,  
16  
17 8 observed/expected event rates, etc) would be used to better ascertain the performance of each  
18  
19 9 CPS. Other analyses such as the net benefit or decision curve would also be measured. To  
20  
21 10 ease analysis the predictive models were dichotomized as follows: Original Wells scores  
22  
23 11 between 0-4 and  $> 4$  will be considered PE unlikely and PE likely respectively (Table 1);  
24  
25 12 Simplified Wells scores between  $\leq 1$  and  $> 1$  will be considered as PE unlikely and PE likely  
26  
27 13 respectively (Table 1); Revised Geneva scores between 0-5 and  $\geq 6$  will be considered PE  
28  
29 14 unlikely and PE likely respectively (Table 2); and SRG scores between 0-2 and  $\geq 3$  will be  
30  
31 15 considered PE unlikely and PE likely respectively (Table 2).  
32  
33  
34  
35  
36  
37  
38  
39  
40  
41  
42

### 17 **Patient and Public Involvement**

18 Data will be collected directly from patients in during the conduction of the study. The  
19 findings of this study will be presented at conferences, to relevant health authorities and will  
20 be published in a biomedical peer-reviewed journal.

### 21 **Ethics and dissemination**

22 Clearance has been granted by the Institutional Review Board of the Faculty of Medicine and  
23 Biomedical Sciences of the University of Yaounde I, Cameroon and the directorates of all

1 participating hospitals to conduct this study. Also, informed consent will be sought from each  
2 patient or their legal next of kin and parental consent will be obtained for all minors. The final  
3 study will be published in a peer-review journal and the findings presented to health  
4 authorities and the healthcare providers.

## 5 **Discussion**

6 PE is the most life-threatening complication of VTE. A recent systematic review on the  
7 epidemiology of venous thromboembolism in Africa found that the prevalence of PE ranges  
8 between 0.14% to – 61.5%[32]. Furthermore, PE accounts for a mortality rate of 53% of  
9 autopsy reports [8]. These high prevalence rates and mortality rates of PE re-iterates the  
10 burden of disease it poses. The ill-health related to PE is further aggravated by the significant  
11 diagnostic challenge in clinical practice and particularly in emergency medicine, due to its  
12 polymorphic clinical presentations and absence of pathognomic clinical signs or symptoms.  
13 Hence, it is common for the diagnosis of PE to be easily missed out [6,7]. CTPA remains the  
14 imaging test to diagnose PE[13]. By paradox, the advent of CTPA let to a reduction in the  
15 prevalence of PE due to an overdiagnosis of PE as a result of an increased index of clinical  
16 suspicion of PE by clinicians[9]. However, CTPA is not void of complications. It may lead to  
17 contrast medium induced nephropathy[11] or radiation medium induced solid tumors [12]. To  
18 advert the sequelae of CTPA, sequential pretest testing using CPS have been introduced.  
19 Appropriate use of these CPS obviates the need of CTPA by 20 - 30%, with an overall 3-  
20 month diagnostic failure rate below 1.5%[18]. Although CPS are routinely used in EDs of  
21 low-resource settings, few studies have cited their external validity in SSA. We intend to use  
22 robust statistical methods with the measurement of discrimination such as area under the  
23 curve (AUC), measures of calibration (calibration plots, Hosmer and Lemeshow statistics,  
24 observed/expected event rates, etc), calculation of net benefit or decision curve which would

1 help ascertain the CPS with the best diagnostic performance for PE amongst all the four CPS  
2 assessed. The findings of this study may guide clinicians in making informed decisions in  
3 predicting PE diagnosis and identification of patients at the need of further testings or  
4 anticoagulants therapy in resource-challenged environments where CTPA is not always  
5 available or affordable to confirm the diagnosis of PE.

## 6 **List of Abbreviations**

7 ED : Emergency department ; CPS : Clinical probability score ; CTPA : computed  
8 tomography pulmonary angiography ; PE : Pulmonary embolism ; SSA : sub-Saharan Africa :  
9 SRG : Simplified Revised Geneva.

10

## 11 **Acknowledgments**

12 The authors thank all administrative staff of participating hospitals for authorizing us to  
13 conduct this study.

14 **Competing interests:** The authors declare that they have no competing interests.

## 15 **Funding**

16 This study received no specific grant from any funding agency in the public, commercial or  
17 not-for-profit sectors.

18 **Authors' Contributions:** AE and JNT: Study protocol conception, design and manuscript  
19 writing. POE, JAMM and JZM: critically revised the manuscript for intellectual content. All  
20 authors read and approved the final manuscript.

21 **Competing interests:** The authors declare that they have no competing interests.

1  
2  
3 1 **Data statement** : All data relevant to the study are included in the article or uploaded as  
4  
5 2 supplementary information. Any other information are available on request from the  
6  
7 3 corresponding author at: joeltochie@gmail.com.  
8  
9

## 10 11 4 12 13 5 **References**

- 14  
15 6 1. Mantilla CB, Horlocker TT, Schroeder DR, Berry DJ, Brown DL. Frequency of  
16 7 myocardial infarction, pulmonary embolism, deep venous thrombosis, and death  
17 8 following primary hip or knee arthroplasty. *Anesthesiology*. 2002;1140–6.
- 19 9 2. Comfere TB, Sprung J, Case KA, Dye PT, Johnson JL, Hall BA, et al. Predictors of  
20 10 mortality following symptomatic pulmonary embolism in patients undergoing  
21 11 noncardiac surgery. *Can J Anaesth*. 2007;54(8):634–41.
- 24 12 3. Sakon M, Kakkar AK, Ikeda M, Sekimoto M, Nakamori S, Yano M, et al. Current  
25 13 status of pulmonary embolism in general surgery in Japan. *Surg Today*. 2004;805–10.
- 27 14 4. Heit JA, Silverstein MD, Mohr DN, Petterson TM, O’Fallon WM, Melton LJ 3rd.  
28 15 Predictors of survival after deep vein thrombosis and pulmonary embolism: a  
29 16 population-based, cohort study. *Arch Intern Med*. 1999;445–53.
- 31 17 5. Jan Belohlavek, Vladimír Dytrych, Ales Linhart. Pulmonary embolism, part I:  
32 18 Epidemiology, risk factors and risk stratification, pathophysiology, clinical presentation,  
33 19 diagnosis and nonthrombotic pulmonary embolism. *Exp Clin Cardiol*. 2013;129–38.
- 36 20 6. Barais M, Morio N, Cuzon Breton A, et al. “I can’t find anything wrong: it must be a  
37 21 pulmonary embolism”: diagnosing suspected pulmonary embolism in primary care, a  
38 22 qualitative study. *PLoS One* 2014;9:e98112.
- 41 23 7. Schiff GD, Hasan O, Kim S, Abrams R, Cosby K, Lambert BL, et al. Diagnostic error in  
42 24 medicine: analysis of 583 physician-reported errors. *Arch Intern Med*.  
43 25 2009;169(20):1881–7.
- 45 26 8. Lindblad B, Eriksson A, Bergqvist D. Autopsy-verified pulmonary embolism in a  
46 27 surgical department: analysis of the period from 1951 to 1988. *Br J Surg*. 1991;1849–52.
- 48 28 9. Wiener RS, Schwartz LM, Woloshin S. Time Trends in Pulmonary Embolism in the  
49 29 United States: Evidence of Overdiagnosis. *Arch Intern Med*. 2011;171(9):831–7.
- 51 30 10. Le Gal G, Bounameaux H. Diagnosing pulmonary embolism: running after the  
52 31 decreasing prevalence of cases among suspected patients. *J Thromb Haemost*.  
53 32 2004;2(8):1244–6.
- 56 33 11. Mitchell AM, Kline JA. Contrast nephropathy following computed tomography  
57 34 angiography of the chest for pulmonary embolism in the emergency department. *J*  
58 35 *Thromb Haemost*. 2007;50–4.

12. Cochran ST, Bomyea K, Sayre JW. Trends in adverse events after IV administration of contrast media. *Am J Roentgenol.* 2001;1385–8.
13. Konstantinides SV, Torbicki A, Agnelli G, Danchin N, Fitzmaurice D, Galiè N, et al. 2014 ESC Guidelines on the diagnosis and management of acute pulmonary embolism: The Task Force for the Diagnosis and Management of Acute Pulmonary Embolism of the European Society of Cardiology (ESC) Endorsed by the European Respiratory Society (ERS). *Eur Heart J.* 2014;35(43):3033–73.
14. Wells PS, Ginsberg JS, Anderson DR, Kearon C, Gent M, Turpie AG, et al. Use of a clinical model for safe management of patients with suspected pulmonary embolism. *Ann Intern Med.* 1998;997–1005.
15. Wells PS, Anderson DR, Rodger M, Ginsberg JS, Kearon C, Gent M, et al. Derivation of a simple clinical model to categorize patient's probability of pulmonary embolism: increasing the model's utility with the SimpliRED d-dimer. *Thromb Haemost.* 2000;416–420.
16. Le Gal G, Righini M, Roy PM, Sanchez O, Aujesky D, Bounameaux H, et al. Prediction of pulmonary embolism in the emergency department: the revised Geneva score. *Ann Intern Med.* 2006;165–71.
17. Kline JA, Nelson RD, Jackson RE, Courtney DM. Criteria for the safe use of d-dimer testing in emergency department patients with suspected pulmonary embolism: a multicenter US study. *Ann Emerg Med.* 2002;144–152.
18. van der Hulle T, Cheung WY, Kooij S, Beenen LFM, van Bommel T, van Es J, et al. Simplified diagnostic management of suspected pulmonary embolism (the YEARS): a prospective, multicentre, cohort study. *Lancet* 2017;390:289-97.
19. Lucassen W, Geersing G-J, Erkens PMG, Reitsma JB, Moons KGM, Büller H, et al. Clinical Decision Rules for Excluding Pulmonary Embolism: A Meta-analysis. *Ann Intern Med.* 2011;155(7):448.
20. Joshua Tambe, Boniface Moifo, Emmanuel Fongang, Emilienne Guegang, Alain Georges Juimo. Acute pulmonary embolism in the era of multi-detector CT: a reality in sub-Saharan Africa. *BMC Medical Imaging.* 2012;31.
21. Hendriksen JMT, Geersing GJ, Lucassen WAM, Erkens PMG, Stoffers HEJH, van Weert HCPM, et al. Diagnostic prediction models for suspected pulmonary embolism: systematic review and independent external validation in primary care. *BMJ* 2015;351:101hhh;3.
22. Righini M, Bounameaux H. External validation and comparison of recently described prediction rules for suspected pulmonary embolism. *Curr Opin Pulm Med.* 2004;345–9.
23. Hendriksen J M T, Geersing G J, Lucassen W A M, Erkens P M G, Stoffers H E J H, van Weert H C P M, et al. Diagnostic prediction models for suspected pulmonary embolism: systematic review and independent external validation in primary care. *BMJ.* 2015;h4438.

- 1  
2  
3 1 24. Moons KGM, Kengne AP, Grobbee DE, Royston P, Vergouwe Y, Altman DG, et al.  
4 2 Risk prediction models: II. External validation, model updating, and impact assessment.  
5 3 Heart. 2012;98(9):691–8.  
6  
7 4 25. Altman DG, Royston P. What do we mean by validating a prognostic model? Stat Med.  
8 5 2000;19(4):453–73.  
9  
10 6 26. Reilly BM, Evans AT. Translating clinical research into clinical practice: impact of  
11 7 using prediction rules to make decisions. Ann Intern Med. 2006;144(3):201–9.  
12  
13 8 27. Justice AC, Covinsky KE, Berlin JA. Assessing the generalizability of prognostic  
14 9 information. Ann Intern Med. 1999;130(6):515–24.  
15  
16 10 28. White RH, Keenan CR. Effects of race and ethnicity on the incidence of venous  
17 11 thromboembolism. Thromb Res. 2009;S11–S17.  
18  
19 12 29. Zakai N, Lutsey P, Folsom A, Cushman M. Black-white differences in venous  
20 13 thrombosis risk: the Longitudinal Investigation of Thromboembolism Etiology (LITE).  
21 14 Blood ASH Annual Meeting Abstracts. 2010;478.  
22  
23 15 30. Schneider D, Lilienfeld D E, Wansoo Im. The Epidemiology of Pulmonary Embolism:  
24 16 Racial Contrasts in Incidence and In-Hospital Case Fatality. JOURNAL OF THE  
25 17 NATIONAL MEDICAL ASSOCIATION. 2006;1967–72.  
26  
27 18 31. Ibrahim SA, Stone RA, Obrosky DS, Sartorius J, Fine MJ, Aujesky D. Racial  
28 19 Differences in 30-Day Mortality for Pulmonary Embolism. Am J Public Health.  
29 20 2006;96(12):2161–4.  
30  
31 21 32. Danwang C, Temgoua MN, Agbor VN, Tankeu AT, Noubiap JJ. Epidemiology of  
32 22 venous thromboembolism in Africa: a systematic review. J Thromb Haemost  
33 23 2017;15:1770-1781.  
34  
35 24 33. Eng J. Sample size estimations: How many individuals should be studied? Radiology.  
36 25 2003;309–13.  
37  
38  
39  
40  
41  
42  
43  
44  
45  
46  
47  
48  
49  
50  
51  
52  
53  
54  
55  
56  
57  
58  
59  
60

1 **Table 1: The Original Wells score and Simplified Wells score for Pulmonary embolism**

| Predictive variables                      | Original Wells score        | Simplified Wells score      |
|-------------------------------------------|-----------------------------|-----------------------------|
| Previous PE or DVT                        | 1.5                         | 1                           |
| Heart rate > 100 bpm                      | 1.5                         | 1                           |
| Recent surgery or immobilization          | 1.5                         | 1                           |
| Clinical signs of DVT                     | 3                           | 1                           |
| Alternative diagnosis less likely than PE | 3                           | 1                           |
| Haemoptysis                               | 1                           | 1                           |
| Cancer                                    | 1                           | 1                           |
|                                           | <b>Pretest probability;</b> | <b>Pretest probability;</b> |
|                                           | 0 – 1: low                  | ≤ 1: PE unlikely (low)      |
|                                           | 2– 6: moderate              | >1: PE likely (high)        |
|                                           | ≥ 7 : high                  |                             |
|                                           | <b>Dichotomized score:</b>  |                             |
|                                           | ≤ 4: PE unlikely (low)      |                             |
|                                           | >4: PE likely (high)        |                             |

DVT: Deep venous thrombosis PE: Pulmonary embolism

2  
3  
4  
5  
6  
7  
8  
9  
10  
11  
12  
13  
14  
15  
16  
17  
18  
19  
20  
21  
22  
23  
24  
25  
26  
27  
28  
29  
30  
31  
32  
33  
34  
35  
36  
37  
38  
39  
40  
41  
42  
43  
44  
45  
46  
47  
48  
49  
50  
51  
52  
53  
54  
55  
56  
57  
58  
59  
60

1  
2  
3 **1 Table 2: The Revised Geneva score and Simplified Revised Geneva score for Pulmonary**  
4 **2 embolism**

| Predictive variables                                                 | Revised Geneva score        | Simplified Revised Geneva score |
|----------------------------------------------------------------------|-----------------------------|---------------------------------|
| Age > 65 years                                                       | 1                           | 1                               |
| Active malignancy (or considered cure < 1 year )                     | 2                           | 1                               |
| Recent surgery or fracture of the lower limbs within 1 month         | 2                           | 1                               |
| Previous PE or DVT                                                   | 3                           | 1                               |
| Haemoptysis                                                          | 2                           | 1                               |
| Unilateral lower limb pain                                           | 3                           | 1                               |
| Tenderness on lower limb deep venous palpation and unilateral oedema | 4                           | 1                               |
| Heart rate                                                           |                             |                                 |
| 75 – 94 bpm                                                          | 3                           | 1                               |
| ≥ 95 bpm                                                             | 5                           | 2                               |
|                                                                      | <b>Pretest probability;</b> | <b>Pretest probability;</b>     |
|                                                                      | 0 – 3: low                  | 0 – 1: low                      |
|                                                                      | 4– 10: moderate             | 2– 4: moderate                  |
|                                                                      | ≥ 11 : high                 | ≥ 5 : high                      |
|                                                                      | <b>Dichotomized score:</b>  | <b>Dichotomized score:</b>      |
|                                                                      | 0 - 5: PE unlikely (low)    | 0 - 2: PE unlikely (low)        |
|                                                                      | ≥ 6: PE likely (high)       | ≥ 3: PE likely (high)           |
| DVT: Deep venous thrombosis    PE: Pulmonary embolism                |                             |                                 |

28  
29 3  
30  
31 4  
32  
33 **5 Figure legend/caption**

34  
35  
36 6 Table 1: The Original Wells score and Simplified Wells score for Pulmonary embolism

37  
38 7 Table 2: The Revised Geneva score and Simplified Revised Geneva score for Pulmonary  
39 8 embolism

40  
41 9 Figure 1 : A flow chart illustrating the study procedure.

42  
43  
44 10 supplementary 1 : Questionnaire

45  
46 11



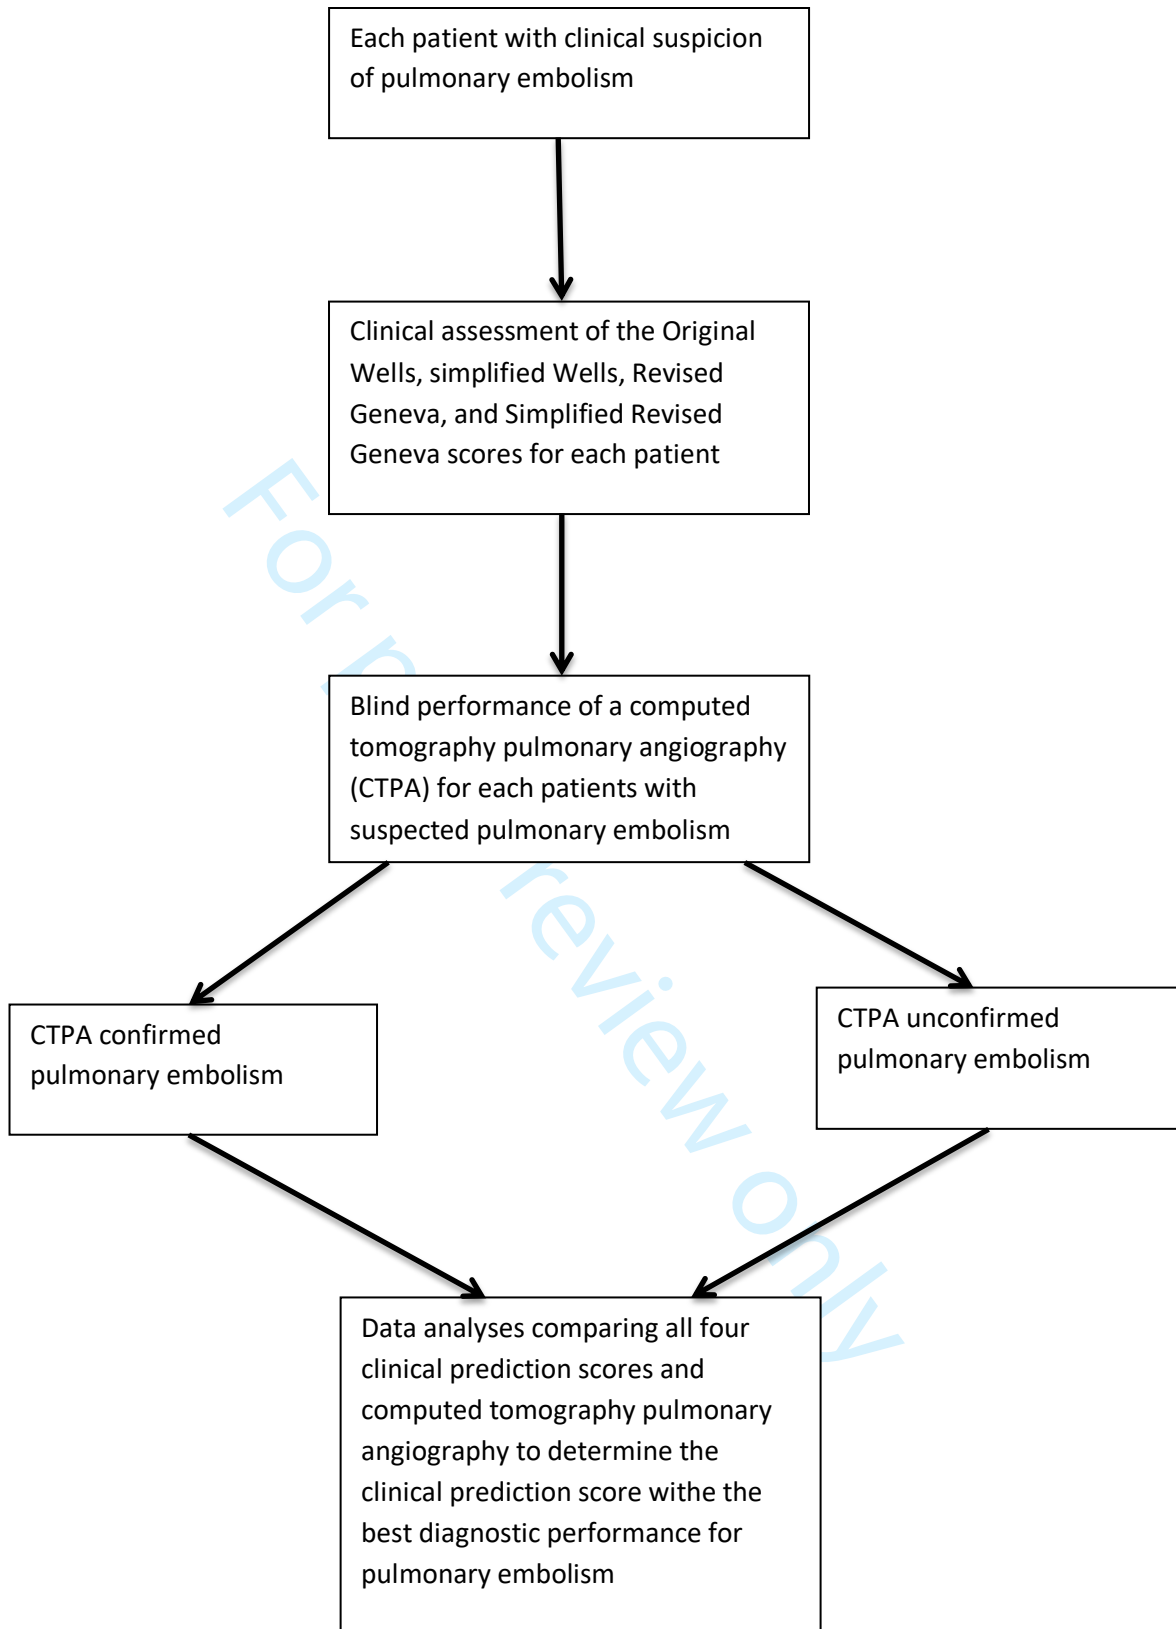

Figure 1 : A flow chart illustrating the study procedure.

**Data collection form**

1-Patient identification number .....

2-Name of patient.....

3- Patient's phone number.....

4-Next of kin phone's number .....

5Age of patient.....

6-Gender: M  F 

7-Date of admission.....

**SECTION B – Presenting complaints**12-Presenting complaint : chest pain  syncope  Dyspnoea  haemoptysis 

If others precise : .....

13- Duration of symptoms before admission:.....

**SECTION C – Past History**14- Medical: Yes  No If yes Hypertension  Diabetes  HIV  Deep venous thrombosis  Pulmonary embolism   
Stroke  cancer  others :.....15- Surgery within the last month: Yes  No 16-Other predisposing factors : Obesity  prolonged trps  Use of hormonal contraceptives   
Specify if others:.....**SECTION C – Physical examination**17-Vital sigs: Blood pressure.....mmHg Pulse.....beats per min respiratory rate .....breat  
per min SPO<sub>2</sub>.....% Temperature.....°C**SECTION D– Evaluation of clinical probability scores for pulmonary embolism**

18- Original Wells et simplified Wells scores (circle the criteria found in the patient)

| Questions                                                       | Original Wells score | Simplified Wells score |
|-----------------------------------------------------------------|----------------------|------------------------|
| Previous thromboembolic disease                                 | 1.5                  | 1                      |
| Heart rate > 100 beats per minute                               | 1.5                  | 1                      |
| Immobilization: bedrest ≥ 3 days or Surgery in the last 4 weeks | 1.5                  | 1                      |
| Signs and symptoms of deep venous thrombosis                    | 3                    | 1                      |
| Diagnostic alternative less likely than pulmonary embolism      | 3                    | 1                      |

|                                                                                            |   |                          |   |                          |
|--------------------------------------------------------------------------------------------|---|--------------------------|---|--------------------------|
| Hemoptysis                                                                                 | 1 |                          | 1 |                          |
| Malignancy: cancer treatment currently or in the last 6 months or receiving palliativecare | 1 | <input type="checkbox"/> | 1 | <input type="checkbox"/> |

**Total Score**

|                             |                                |
|-----------------------------|--------------------------------|
| <b>Pretest probability;</b> | <b>Probabilite du pretest;</b> |
| 0 – 1: low                  | ≤ 1: PE unlikely (low)         |
| 2– 6: moderate              | >1: PE likely (high)           |
| ≥ 7 : high                  |                                |
| <b>Dichotomized score:</b>  |                                |
| ≤ 4: PE unlikely (low)      |                                |
| >4: PE likely (high)        |                                |

DVT: Deep venous thrombosis PE: Pulmonary embolism

**19- The Revised Geneva score and Simplified Revised Geneva score for Pulmonary embolism**  
(circle the criteria found in the patient)

| Predictive variables                                                 | Revised Geneva score        | Simplified Revised Geneva score |
|----------------------------------------------------------------------|-----------------------------|---------------------------------|
| Age > 65 years                                                       | 1                           | 1                               |
| Active malignancy (or considered cure < 1 year )                     | 2                           | 1                               |
| Recent surgery or fracture of the lower limbs within 1 month         | 2                           | 1                               |
| Previous PE or DVT                                                   | 3                           | 1                               |
| Haemoptysis                                                          | 2                           | 1                               |
| Unilateral lower limb pain                                           | 3                           | 1                               |
| Tenderness on lower limb deep venous palpation and unilateral oedema | 4                           | 1                               |
| Heart rate                                                           |                             |                                 |
| 75 – 94 bpm                                                          | 3                           | 1                               |
| ≥ 95 bpm                                                             | 5                           | 2                               |
|                                                                      | <b>Pretest probability;</b> | <b>Pretest probability;</b>     |
|                                                                      | 0 – 3: low                  | 0 – 1: low                      |
|                                                                      | 4– 10: moderate             | 2– 4: moderate                  |
|                                                                      | ≥ 11 : high                 | ≥ 5 : high                      |
|                                                                      | <b>Dichotomized score:</b>  | <b>Dichotomized score:</b>      |
|                                                                      | 0 - 5: PE unlikely (low)    | 0 - 2: PE unlikely (low)        |
|                                                                      | ≥ 6: PE likely (high)       | ≥ 3: PE likely (high)           |

DVT: Deep venous thrombosis PE: Pulmonary embolism

**20- Differential Diagnoses evoked:** Pulmonary embolism  Acute coronary syndrome

Others:.....

**SECTION E – Findings on computed tomography angiography**

21-Dilated right ventricle: Yes  No

22-Leftward deviation of the interventricular septum : Yes  No

1  
2  
3  
4  
5  
6  
7  
8  
9  
10  
11  
12  
13  
14  
15  
16  
17  
18  
19  
20  
21  
22  
23  
24  
25  
26  
27  
28  
29  
30  
31  
32  
33  
34  
35  
36  
37  
38  
39  
40  
41  
42  
43  
44  
45  
46  
47  
48  
49  
50  
51  
52  
53  
54  
55  
56  
57  
58  
59  
60

24-A thrombus seen in the pulmonary vessels: Yes  No

25-Other Findings:.....

26-Conclusion of CT-scan results : Pulmonary embolism : Yes  No

For peer review only
