# Supplementary material for: Validity of four clinical prediction scores for pulmonary embolism in a sub-Saharan African setting: a protocol for a Cameroonian multicentre cross-sectional study
Source: PubMed Central journal article supplement — BMJ Open. 2019 Oct 15;9(10):e031322. doi: 10.1136/bmjopen-2019-031322 (PMC6797288; doi:10.1136/bmjopen-2019-031322), 2019-10-15
Supplement: bmjopen-2019-031322supp001.pdf [file bmjopen-2019-031322supp001.pdf]

**Data collection form**

1-Patient identification number .....

2-Name of patient.....

3- Patient's phone number.....

4-Next of kin phone's number .....

5Age of patient.....

6-Gender: M  F 

7-Date of admission.....

**SECTION B – Presenting complaints**12-Presenting complaint : chest pain  syncope  Dyspnoea  haemoptysis 

If others precise : .....

13- Duration of symptoms before admission:.....

**SECTION C – Past History**14- Medical: Yes  No If yes Hypertension  Diabetes  HIV  Deep venous thrombosis  Pulmonary embolism   
Stroke  cancer  others :.....15- Surgery within the last month: Yes  No 16-Other predisposing factors : Obesity  prolonged trips  Use of hormonal contraceptives   
Specify if others:.....**SECTION C – Physical examination**17-Vital signs: Blood pressure.....mmHg Pulse.....beats per min respiratory rate .....breath  
per min SPO<sub>2</sub>.....% Temperature.....°C**SECTION D– Evaluation of clinical probability scores for pulmonary embolism**

18- Original Wells et simplified Wells scores (circle the criteria found in the patient)

| Questions                                                       | Original Wells score | Simplified Wells score |
|-----------------------------------------------------------------|----------------------|------------------------|
| Previous thromboembolic disease                                 | 1.5                  | 1                      |
| Heart rate > 100 beats per minute                               | 1.5                  | 1                      |
| Immobilization: bedrest ≥ 3 days or Surgery in the last 4 weeks | 1.5                  | 1                      |
| Signs and symptoms of deep venous thrombosis                    | 3                    | 1                      |
| Diagnostic alternative less likely than pulmonary embolism      | 3                    | 1                      |

|                                                                                             |   |                          |   |                          |
|---------------------------------------------------------------------------------------------|---|--------------------------|---|--------------------------|
| Hemoptysis                                                                                  | 1 |                          | 1 |                          |
| Malignancy: cancer treatment currently or in the last 6 months or receiving palliative care | 1 | <input type="checkbox"/> | 1 | <input type="checkbox"/> |

---

|                    |                             |                                |
|--------------------|-----------------------------|--------------------------------|
| <b>Total Score</b> | <b>Pretest probability;</b> | <b>Probabilite du pretest;</b> |
|                    | 0 – 1: low                  | ≤ 1: PE unlikely (low)         |
|                    | 2– 6: moderate              | > 1: PE likely (high)          |
|                    | ≥ 7 : high                  |                                |
|                    | <b>Dichotomized score:</b>  |                                |
|                    | ≤ 4: PE unlikely (low)      |                                |
|                    | >4: PE likely (high)        |                                |

DVT: Deep venous thrombosis PE: Pulmonary embolism

**19- The Revised Geneva score and Simplified Revised Geneva score for Pulmonary embolism**  
(circle the criteria found in the patient)

| Predictive variables                                                 | Revised Geneva score        | Simplified Revised Geneva score |
|----------------------------------------------------------------------|-----------------------------|---------------------------------|
| Age > 65 years                                                       | 1                           | 1                               |
| Active malignancy (or considered cure < 1 year )                     | 2                           | 1                               |
| Recent surgery or fracture of the lower limbs within 1 month         | 2                           | 1                               |
| Previous PE or DVT                                                   | 3                           | 1                               |
| Haemoptysis                                                          | 2                           | 1                               |
| Unilateral lower limb pain                                           | 3                           | 1                               |
| Tenderness on lower limb deep venous palpation and unilateral oedema | 4                           | 1                               |
| Heart rate                                                           |                             |                                 |
| 75 – 94 bpm                                                          | 3                           | 1                               |
| ≥ 95 bpm                                                             | 5                           | 2                               |
|                                                                      | <b>Pretest probability;</b> | <b>Pretest probability;</b>     |
|                                                                      | 0 – 3: low                  | 0 – 1: low                      |
|                                                                      | 4– 10: moderate             | 2– 4: moderate                  |
|                                                                      | ≥ 11 : high                 | ≥ 5 : high                      |
|                                                                      | <b>Dichotomized score:</b>  | <b>Dichotomized score:</b>      |
|                                                                      | 0 - 5: PE unlikely (low)    | 0 - 2: PE unlikely (low)        |
|                                                                      | ≥ 6: PE likely (high)       | ≥ 3: PE likely (high)           |

DVT: Deep venous thrombosis PE: Pulmonary embolism

**20- Differential Diagnoses evoqued:** Pulmonary embolism  Acute coronary syndrome

Others:.....

**SECTION E – Findings on computed tomography angiography**

21-Dilated right ventricle: Yes  No

22-Leftward deviation of the interventricular septum : Yes  No

24-A thrombus seen in the pulmonary vessels: Yes  No

25-Other Findings:.....

26-Conclusion of CT-scan results : Pulmonary embolism : Yes  No
